1           **The CHORD protein CHP-1 regulates EGF receptor trafficking and**  
2                           **signaling in *C. elegans* and in human cells**

3  
4

5 Andrea Haag<sup>1,2,\*</sup>, Michael Walser<sup>1,\*</sup>, Adrian Henggeler<sup>1,3</sup>, Alex Hajnal<sup>1,°</sup>

6 <sup>1</sup> Institute of Molecular Life Sciences, University of Zürich, Winterthurerstrasse 190, Zürich CH-8057,  
7 Switzerland

8 <sup>2</sup> Molecular Life Science Zürich PhD Program, Zürich, Switzerland

9 <sup>3</sup> Present address: Institute of Biochemistry ETH Zürich, Otto-Stern-Weg 3, Zürich CH-8093,  
10 Switzerland

11 \*These authors contributed equally

12 ° Corresponding author: alex.hajnal@imls.uzh.ch

13

Haag et al.

14 **Abstract**

15 **The intracellular trafficking of growth factor receptors determines the activity of their**  
16 **downstream signaling pathways. The putative co-chaperone CHP-1 acts as a regulator of EGFR**  
17 **trafficking during *C.elegans* vulval development. Loss of *chp-1* causes the retention of the**  
18 **EGFR in the ER and decreased MAPK signaling. CHP-1 functions specifically, as the localization**  
19 **of other receptors is unaltered in *chp-1(lf)* mutants, and inhibiting other co-chaperones does**  
20 **not affect EGFR localization. The role of CHP-1 during EGFR trafficking is conserved in**  
21 **humans. Analogous to *C.elegans*, the response of CHP-1-deficient human cells to EGF**  
22 **stimulation is attenuated, the EGFR accumulates in the ER and ERK2 activity is decreased.**  
23 **Although CHP-1 has been proposed to act as a co-chaperone for HSP90, our data indicate an**  
24 **HSP90-independent function of CHP-1. The identification of CHP-1 as a regulator of EGFR**  
25 **trafficking opens the possibility to identify small molecule chaperone inhibitors targeting the**  
26 **EGFR pathway with increased selectivity.**

27

Haag et al.

## 28 **Introduction**

29 The generation and maintenance of cellular polarity is essential for the development and  
30 homeostasis of organs. Cell polarity governs various processes, such as cell migration, asymmetric  
31 cell division and morphogenesis (Bryant & Mostov, 2008). Most of these processes are regulated by  
32 extracellular signals, which are received and transduced by specific receptors on the plasma  
33 membrane. The intracellular trafficking and subcellular localization of these receptors in polarized  
34 epithelial cells profoundly affects their ligand binding capabilities and the activation of the  
35 downstream signaling pathways. In particular, the EGFR family of receptor tyrosine kinases, which  
36 are activated by a multitude of ligands, play essential roles during the development of most epithelial  
37 organs (Citri & Yarden, 2006; Sorkin & Goh, 2009).

38 In contrast to mammals, *C. elegans* expresses only one EGFR homolog, LET-23, and a single EGF family  
39 ligand, LIN-3 (Sundaram, 2006). Thanks to this lack of redundancy, the *C. elegans* EGF/EGFR  
40 signaling system is well suited for systematic genetic analysis. LET-23 EGFR signaling controls a  
41 variety of developmental processes, including the development of the vulva, the egg-laying organ of  
42 the hermaphrodite (Sternberg, 2005). During vulval development, the six vulval precursor cells  
43 (VPCs) P3.p to P8.p are induced by an LIN-3 EGF signal from the anchor cell (AC) to differentiate into  
44 vulval cells (**Fig. 1A**). The polarized distribution of LET-23 is crucial for the efficient activation of the  
45 downstream RAS/MAPK signaling pathway and the induction of the vulval cell fates (Kaech *et al*,  
46 1998; Whitfield *et al*, 1999). P6.p, the VPC closest to the AC, receives the highest dose of LIN-3 and  
47 adopts the primary (1°) cell fate. At the same time, P6.p activates via a lateral Delta signal the LIN-12  
48 Notch signaling pathway in its neighbors P5.p and P7.p, which inhibits the 1° and induces the  
49 secondary (2°) fate in these VPCs (Sternberg, 2005b; Berset *et al*, 2001). The remaining VPCs P3.p,  
50 P4.p & P8.p that receive neither the inductive LIN-3 nor the lateral LIN-12 signal adopt the tertiary  
51 (3°) cell fate. The 3° VPCs divide once before fusing to the hypodermis hyp7. Hyperactivation of the  
52 EGFR/RAS/MAPK pathway causes more than three VPCs to adopt a vulval cell fate and a multivulva  
53 (Muv) phenotype, whereas reduced EGFR/RAS/MAPK signaling results in the induction of fewer  
54 than three VPCs and a vulvaless (Vul) phenotype.

55 Thanks to the availability of functional GFP tagged LET-23 reporters and the transparent body, vulval  
56 development is an excellent model to observe EGFR trafficking and localization in the epithelial VPCs  
57 of living animals (Haag *et al*, 2014). Before vulval induction, LET-23 is equally expressed in all VPCs.  
58 During induction, a positive MAP kinase MPK-1 feedback signal up-regulates LET-23 expression in  
59 P6.p, which allows this cell to sequester most of the inductive LIN-3 EGF signal (Stetak *et al*, 2006).  
60 By contrast, LIN-12 NOTCH signaling in P5.p and P7.p results in the down-regulation of LET-23 and

Haag et al.

61 the inhibition of RAS/MAPK signaling (Whitfield *et al*, 1999).  
62 Several factors that regulate RAS/MAPK activity by controlling the sub-cellular localization and  
63 trafficking of the LET-23 EGFR in the VPCs have been identified. The basolateral localization of LET-  
64 23 by the tripartite LIN-2/CASK, LIN-10/ MINT and LIN-7/VELIS protein complex is necessary for  
65 efficient receptor activation, because LIN-3 is secreted by the AC in the somatic gonad facing the  
66 basolateral compartment of the VPCs (Kaech *et al*, 1998; Hoskins *et al*, 1996). On the other hand, the  
67 ARF GTPase exchange factor AGEF-1 antagonizes via the ARF GTPase and the AP-1 adaptor complex  
68 the basolateral localization of LET-23 (Skorobogata *et al*, 2014). A systematic in vivo screen in live *C.*  
69 *elegans* larvae has identified multiple additional regulators of LET-23 localization and signaling  
70 (Haag *et al*, 2014). One candidate identified in this screen was *chp-1*, which encodes a Cysteine and  
71 Histidine Rich Domain (CHORD) containing protein homologous to human CHORDC1 (also named  
72 Morgana) (Brancaccio *et al*, 2003; Ferretti *et al*, 2011). CHORDC1 has been proposed to function as  
73 co-chaperone with HSP90, though CHORDC1 may also act independently of HPS90 (Gano & Simon,  
74 2010a).  
75 Here, we show that a loss of *chp-1* function in *C. elegans* leads to the accumulation of LET-23 EGFR in  
76 the endoplasmic reticulum (ER) of the VPCs, resulting in a strongly reduced activity of the RAS/MAPK  
77 pathway. CHP-1 is specifically required for LET-23 localization, as the secretion of other trans-  
78 membrane receptors to the VPC plasma membrane is unchanged in the absence of *chp-1*.  
79 Furthermore, we shown that deletion of CHORDC1 in human cells leads to the ER mislocalization of  
80 the EGFR and to a loss of EGF-induced filopodia formation. Analogous to *C. elegans chp-1*, deletion of  
81 human CHORDC1 does not eliminate but rather attenuates the activation of the MAPK pathway in  
82 response to EGF stimulation. We propose that CHP-1 CHORDC1 plays a conserved and specific  
83 function during the maturation and membrane secretion of the EGFR.

84

## 85 **Results**

### 86 ***chp-1* is required for basolateral localization of the EGFR LET-23**

87 The basolateral localization of the LET-23 EGFR in the VPCs of *C. elegans* larvae is necessary for the  
88 efficient binding of the LIN-3 EGF ligand secreted by the AC (**Fig. 1A**) (Kaech *et al*, 1998; Whitfield *et*  
89 *al*, 1999). LET-23 is initially secreted to the basolateral membrane compartment, but after ligand-  
90 induced receptor endocytosis and transcytosis LET-23 accumulates on the apical cortex of the VPCs  
91 (Haag *et al*, 2014). In late L2/early L3 larvae before the VPCs have started dividing, a translational  
92 LET-23::GFP reporter was up-regulated in the 1° VPC P6.p, while expression faded in the other, more

Haag et al.

93 distal VPCs. Most of the LET-23::GFP protein in P6.p was detected, approximately at equal levels, on  
94 the basolateral and apical plasma membranes (**Fig. 1B**). Only a faint and diffuse intracellular LET-  
95 23::GFP signal could be observed in the VPCs of wild-type animals. After the first round of VPC  
96 divisions, LET-23::GFP continued to be strongly expressed on the plasma membrane of the 1° P6.p  
97 descendants (**Fig. 1B'**). A systematic RNA interference screen for genes controlling LET-23  
98 trafficking had previously identified the *chp-1* gene as a regulator of LET-23 localization (Haag *et al*,  
99 2014). *chp-1* encodes a conserved CHORD-containing protein homologous to human  
100 CHORDC1/Morgana (Ferretti *et al*, 2011). RNAi against *chp-1* leads to a strong reduction in plasma  
101 membrane localization and to the intracellular accumulation of the LET-23::GFP reporter in P6.p and  
102 its descendants (**Fig. 1C,C'**). To confirm the RNAi-induced phenotype, we examined LET-23  
103 localization in *chp-1(tm2277)* deletion mutants (*chp-1(lf)*). Since homozygous *chp-1(lf)* mutants are  
104 sterile as adults, we analyzed LET-23 EGFR localization in the homozygous offspring of heterozygous  
105 *chp-1(lf)/hT2* balanced mothers. In the following experiments, we compared *chp-1(lf)* homozygous  
106 larvae to balanced *chp-1(lf)/hT2* heterozygous control siblings, since LET-23::GFP localization in *chp-1*  
107 *1(lf)/+* heterozygotes was indistinguishable from wild-type animals (for example, compare **Fig. 1B**  
108 with **Fig. 3A**). Homozygous *chp-1(lf)* L2 and L3 larvae exhibited a completely penetrant intracellular  
109 mislocalization of LET-23 EGFR in the VPCs and their descendants (**Fig. 1D,D'**). The distinct plasma  
110 membrane signal observed in the VPCs of wild-type animals was absent in *chp-1(lf)* larvae.

111 In mammalian cells, CHORDC1/Morgana forms a complex with the heat-shock protein 90 (HSP90)  
112 and was proposed to function as a co-chaperone for a subset of HSP90 clients (Gano & Simon, 2010a).  
113 We therefore tested if a mutation in the *C. elegans hsp-90* homolog *daf-21* affects LET-23 EGFR  
114 localization. The *daf-21* reference allele *p673* is sub-viable when the animals are grown at 15°C, but  
115 causes larval arrest at higher temperatures (Birnby *et al*, 2000). Even though LET-23::GFP  
116 expression in the VPCs of *daf-21(p673)* that had been up-shifted at the L2 stage to 24°C was reduced,  
117 most of the LET-23::GFP signal localized at the plasma membrane, and we did not observe an  
118 increase in intracellular localization as observed in *chp-1(lf)* mutants (**suppl. Fig. S1A**). Moreover,  
119 we examined LET-23::GFP localization after RNAi knock-down of other known HSP90 co-  
120 chaperones, such as *cdc-37*, *daf-41* and *sgt-1* (Li *et al*, 2012), but observed no changes in LET-23::GFP  
121 localization (**suppl. Fig. S1B-D**).

122 Taken together, the CHORD-containing protein CHP-1 is required for the plasma membrane  
123 localization of the EGFR in the vulval cells independently of the HSP90 chaperone.

124

Haag et al.

## 125 ***chp-1* acts cell autonomously in the VPCs**

126 We next tested if *chp-1* acts cell-autonomously in the VPCs by using a tissue-specific CRISPR/Cas9  
127 approach (Shen *et al*, 2014). For this purpose, we expressed the Cas9 endonuclease under control of  
128 a 1° VPC-specific *egl-17* promoter fragment (Inoue *et al*, 2002) together with two single-guide (sg)  
129 RNAs that target the first exon of *chp-1* and were expressed under control of the ubiquitous *eft-3*  
130 promoter (*zhEx558*, see materials and methods). In around 5% of *zhEx558* animals, we observed an  
131 intracellular accumulation of LET-23::GFP. In all of these cases, LET-23::GFP was mislocalized only  
132 in the 1° VPC P6.p and its descendants (**Fig. 1F,F'**). Control sibling lacking the *zhEx558* array showed  
133 a wild-type membrane localization of LET-23::GFP (**Fig. 1E,E'**). The relatively low penetrance of the  
134 CRISPR/CAS9-induced mislocalization phenotype could be due to an inefficient binding of the sgRNAs  
135 to the target sequence, to mosaic expression of the extrachromosomal array or to the perdurance of  
136 the CHP-1 protein in the VPCs.

137 These experiments indicated that CHP-1 acts cell-autonomously to regulate LET-23::GFP localization  
138 in the VPCs.

139

## 140 ***chp-1* is a specific regulator of LET-23 localization in the VPCs**

141 To investigate if *chp-1* plays a general role in membrane trafficking, we examined the expression  
142 pattern of three other trans-membrane receptors expressed in the VPCs; LIN-12 NOTCH (Shaye &  
143 Greenwald, 2002), LIN-18 RYK (Inoue *et al*, 2004) and the  $\beta$ -integrin subunit PAT-3 (Hagedorn *et al*,  
144 2009). The translational LIN-12::GFP reporter was expressed on the apical membrane of the VPCs  
145 (**Fig. 1G**), while the LIN-18::GFP and PAT-3::GFP translational reporters localized predominantly to  
146 the basolateral compartment (**Fig. 1H,I**). *chp-1* RNAi did not alter the apical localization of the LIN-  
147 12::GFP reporter (**Fig. 1G'**). Furthermore, the *chp-1(lf)* mutation did not affect the basolateral  
148 localization of the LIN-18::GFP or the PAT-3::GFP reporter (**Fig. 1H',I'**).

149 Thus, CHP-1 does not play a general role in the apical or basolateral secretion of trans-membrane  
150 receptors, but it is rather specifically required for the membrane localization of the EGFR.

151

## 152 **Loss of *chp-1* function causes the accumulation of LET-23 EGFR in the endoplasmic reticulum**

153 The intracellular accumulation of LET-23::GFP in *chp-1(lf)* mutants appeared granular and unevenly  
154 structured, while in *chp-1(lf)/+* control animals, LET-23::GFP was localized predominantly at the  
155 plasma membrane of the 1° VPC P6.p and its descendants (**Fig. 2A-C**; note that single mid-sagittal

Haag et al.

156 confocal sections through the VPCs are shown in **Fig. 2**, whereas **Figs. 1&3** shows wide-field images  
157 of the entire VPCs.) In order to determine the intracellular compartment, in which LET-23::GFP  
158 accumulates in *chp-1(lf)* mutants, we generated two reporters that mark the Golgi and the  
159 endoplasmic reticulum (ER) of the VPCs, respectively. To label the Golgi apparatus, we expressed an  
160 alpha-mannosidase 2A AMAN-2::mCherry fusion protein in the VPCs under control of the pan-  
161 epithelial *dlg-1* promoter. AMAN-2 has previously been shown to localize to the Golgi network in the  
162 *C. elegans* intestine (Chen *et al*, 2006). In contrast to vertebrate cells that contain one large juxta-  
163 nuclear Golgi stack, invertebrate cells contain many small Golgi stacks (Golgi “ministacks”) dispersed  
164 throughout the cytoplasm (Ripoche *et al*, 1994). Accordingly, the AMAN-2::mCherry reporter  
165 labelled punctate structures scattered throughout the cytoplasm of the VPCs (**Fig. 2A'-F'**). In *chp-*  
166 *1(lf)/+* animals, LET-23::GFP showed on average 26% co-localization with the AMAN-2::mCherry  
167 reporter when analyzed on a voxel per voxel basis in confocal optical sections of the VPCs (**Fig. 2A-**  
168 **C''** and **suppl. Fig. S2**). In homozygous *chp-1(lf)* mutants, the co-localization with AMAN-2::mCherry  
169 was slightly increased to 34.4% (**Fig. 2D-F''** and **suppl. Fig. S2**). However, the strongest LET-23::GFP  
170 signal was detected at the plasma membrane, indicating that only a minor fraction of LET-23::GFP is  
171 found in the Golgi apparatus.

172 To label the ER compartment of the VPCs, we created a reporter consisting of the *dlg-1* promoter  
173 driving expression of an *mCherry* tag C-terminally fused to the C34B2.10 gene, which encodes the 12-  
174 kDa subunit (SP12) of the *C. elegans* ER signal peptidase complex (Rolls *et al*, 2002). Translational  
175 SP12 reporters have previously been shown to localize to a reticular tubular network that extends  
176 to the cortex in various cell types of *C. elegans* and resembles the ER architecture in yeast and  
177 mammalian cells (Voeltz *et al*, 2002). In confocal sections through the VPCs of *chp-1(lf)/+* animals,  
178 we observed 34% co-localization between the SP12::mCherry and LET-23::GFP reporters, though the  
179 strongest LET-23::GFP signal intensity was found at the cell cortex where no SP12::mCherry was  
180 detected (**Fig. 2G-I''** and **suppl. Fig. S2**). By contrast, in homozygous *chp-1(lf)* mutants we observed  
181 a strong overlap between the LET-23::GFP and SP12::mCherry signals inside the cells, resulting in  
182 64% co-localization between the two reporters (**Fig. 2J-L''** and **suppl. Fig. S2**).

183 Therefore, the loss of *chp-1* function leads to the intracellular retention of LET-23 mainly in the ER.

184  
185 **ER mislocalization of LET-23 in *chp-1(lf)* mutants does not activate the unfolded protein**  
186 **response pathway**

187 Since LET-23::GFP accumulated mainly in the ER compartment of *chp-1(lf)* mutants, we tested if loss  
188 of *chp-1* function causes ER stress triggering the unfolded protein response (UPR) pathway. The *hsp-*

Haag et al.

189 4 gene encodes a homolog of the mammalian Grp78/BiP protein that is upregulated upon ER stress  
190 via the XBP-1 transcription factor and the IRE-1 kinase/endoribonuclease (Calfon *et al*, 2002). The  
191 expression of an *hsp-4::gfp* reporter thus serves as an in vivo readout for the UPR (Taylor & Dillin,  
192 2013). As a positive control, we treated animals with tunicamycin, which induces UPR by blocking  
193 the formation of N-acetylglucosamine lipid intermediates necessary for the glycosylation of newly  
194 synthesized proteins in the ER (Taylor & Dillin, 2013). Untreated *chp-1(lf)* mutants did not show  
195 elevated *hsp-4::GFP* expression when compared to the wild-type (**suppl. Fig. S3A,C,E**). A 4 hour  
196 exposure of young adult wild-type animals to 25µg/ml tunicamycin caused an approximately 8-fold  
197 increase in *hsp-4::GFP* fluorescence intensity (**suppl. Fig. S3B,E**). Interestingly, tunicamycin-treated  
198 *chp-1(lf)* mutants exhibited a stronger induction of *hsp-4::GFP* expression (**suppl. Fig. S3D,E**).

199 Taken together, the intracellular accumulation of LET-23 in the *chp-1(lf)* mutants does not activate  
200 the UPR pathway under standard conditions. However, *chp-1(lf)* mutants are slightly hypersensitive  
201 to ER stress induced by tunicamycin-treatment.

202

### 203 **Intracellular LET-23 EGFR accumulation in *chp-1(lf)* mutants is ligand-independent**

204 Binding of the LIN-3 EGF ligand to the LET-23 EGFR on the basolateral cortex of the VPCs induces  
205 rapid receptor endocytosis (Haag *et al*, 2014). The endocytosed LET-23 can be recycled to the  
206 basolateral compartment, transported via transcytosis to the apical membrane compartment or  
207 undergo lysosomal degradation (Whitfield *et al*, 1999; Stetak *et al*, 2006). In *lin-3(e1417)* mutants, in  
208 which LIN-3 expression is specifically reduced in the AC (Hwang & Sternberg, 2004), LET-23::GFP  
209 accumulated on the basolateral cortex of the VPCs, while the apical LET-23::GFP signal was reduced  
210 (**Fig. 3C**) (Haag *et al*, 2014). We therefore examined whether the intracellular accumulation of LET-  
211 23 in *chp-1(lf)* mutants depends on ligand-induced receptor endocytosis. In *lin-3(e1417); chp-1(lf)*  
212 double mutants, we observed the same intracellular accumulation of LET-23::GFP as in *chp-1(lf)*  
213 single mutants (**Fig. 3B,D**). We further tested if a global reduction in endocytosis alters LET-23::GFP  
214 localization in *chp-1(lf)* mutants. For this purpose, we performed RNAi against *rab-5*, which encodes  
215 a small GTPase that functions as a key regulator of early endosome formation and was previously  
216 shown to control LET-23 trafficking (Skorobogata & Rocheleau, 2012). Similar to the *lin-3(e1417)*  
217 mutation, *rab-5i* did not prevent the intracellular accumulation of LET-23::GFP in *chp-1(lf)* mutants,  
218 indicating that *chp-1(lf)* does not cause the accumulation of LET-23 in the endocytic compartment  
219 (**Fig. 3E,F**).

220 Next, we asked whether *chp-1* acts at the level of the tripartite LIN-2/LIN-7/LIN-10 complex, which  
221 is required for the basolateral retention of LET-23 and facilitates ligand binding (Kaech *et al*, 1998;



Haag et al.

222 Whitfield *et al*, 1999). Mutations in *lin-2*, *lin-7* or *lin-10* cause a penetrant vulvaless (Vul) phenotype  
223 because LET-23 is mislocalized to the apical membrane compartment, where it cannot bind to LIN-3  
224 secreted by the AC on the basal side of the VPCs. In *lin-2(lf)* single mutants, the LET-23::GFP signal  
225 was detected almost exclusively on the apical membranes of the VPCs (**Fig. 3G**). In *chp-1(lf); lin-2(lf)*  
226 double mutants a major fraction of the LET-23::GFP signal was found in the intracellular  
227 compartment, similar to *chp-1(lf)* single mutants (**Fig. 3H**). However, we did observe a faint LET-  
228 23::GFP signal on the apical cortex in *chp-1(lf); lin-2(lf)* double mutants, indicating that a fraction of  
229 LET-23::GFP can be secreted to the apical plasma membrane in the absence of *chp-1*. Finally, RNAi  
230 against *sar-1*, which encodes a small GTP binding protein required for ER to Golgi transport, caused  
231 the same intracellular mislocalization of LET-23::GFP as observed in *chp-1(lf)* mutants (**Fig. 3I**).

232 Taken together, we conclude that CHP-1 does not regulate the ligand-induced endocytosis or  
233 basolateral retention of LET-23, but rather the secretion of the receptor from the ER to the plasma  
234 membrane.

235

### 236 ***chp-1* is a positive regulator of EGFR/RAS/MAPK signaling in the VPCs**

237 The basolateral membrane localization of LET-23 is necessary for efficient ligand binding and  
238 activation of the downstream RAS/MAPK signaling pathway in the VPCs (Kaech *et al*, 1998; Hoskins  
239 *et al*, 1996; Whitfield *et al*, 1999). To quantify the output of the RAS/MAPK pathway in the VPCs, we  
240 analyzed the expression of a transcriptional  $P_{egl-17}::cfp$  reporter as a marker for the 1° cell fate  
241 (Burdine *et al*, 1998). *egl-17* encodes a fibroblast growth factor (FGF)-like protein, which is up-  
242 regulated by RAS/MAPK signaling in the 1° VPC (P6.p) and its descendants until the late L3 stage.  
243  $P_{egl-17}::cfp$  expression in the VPCs of *chp-1(lf)* mutants at the Pn.pxx stage was decreased around five-  
244 fold when compared to wild-type larvae at the same stage (**Fig. 4A,B,E**). We also examined the  
245 activity of the lateral NOTCH signaling pathway using a transcriptional  $P_{lip-1}::gfp$  reporter that is up-  
246 regulated in 2° VPC in response to LIN-12 NOTCH activation (Berset *et al*, 2001). Expression of the  
247  $P_{lip-1}::gfp$  reporter was unchanged in *chp-1(lf)* mutants (**Fig. 4C,D**). Thus, CHP-1 acts as a positive  
248 regulator of RAS/MAPK signaling, while the activity of the lateral NOTCH pathway is not affected by  
249 *chp-1(lf)*.

250 Despite the strong reduction in RAS/MAPK reporter expression, the VPCs in *chp-1(lf)* mutants were  
251 induced to proliferate and differentiate into vulval cells. In most *chp-1(lf)* single mutants, the three  
252 proximal VPCs P5.p through P7.p differentiated, as in wild-type animals (**Fig. 4F,G**). However, the  
253 vulval invagination formed by the descendants of the induced VPCs had an abnormal shape and the  
254 vulval cells formed two separate invaginations, indicating that CHP-1 performs additional functions

Haag et al.

255 during vulval morphogenesis (**Fig. 4G**). To quantify vulval induction, we determined the vulval  
256 induction index (VI) by counting the average number of VPCs per animals that were induced to  
257 differentiate (Schmid *et al*, 2015). A VI of 3 indicates wild-type differentiation, while a VI>3 signifies  
258 over- and a VI<3 under-induction. The VI thus serves as a quantitative readout to examine genetic  
259 interactions between signaling pathway components. Most *chp-1(lf)* mutants showed a VI of 3,  
260 though we observed over- as well as under-induced animals (**Fig. 4L**).

261 To investigate the interaction between *chp-1* and the EGFR/RAS/MAPK signaling pathway, we  
262 constructed double mutants between *chp-1(lf)* and core EGFR/RAS/MAPK pathway components.  
263 The *lin-3(e1417rf)* allele caused a strong reduction in the VI of *chp-1(lf)* mutants, approximately to  
264 the level of *lin-3(e1417)* single mutants (**Fig. 4H,I,L**) (Hwang & Sternberg, 2004). This indicates that  
265 the VPCs in *chp-1(lf)* mutants are at least partially sensitive to the inductive AC signal. Moreover,  
266 double mutants between *chp-1(lf)* and *let-23 egfr(sy1)* or *lin-2(lf)* exhibited a significantly stronger  
267 Vul phenotype than *let-23(sy1)* or *lin-2(lf)* single mutants (**Fig. 4L**). The *let-23(sy1)* allele specifically  
268 prevents the interaction of LET-23 EGFR with the LIN-2/LIN-7/LIN-10 receptor localization complex  
269 and causes a similar apical receptor mislocalization and partially penetrant Vul phenotype as the *lin-*  
270 *2(lf)* mutation (Kaeck *et al*, 1998; Whitfield *et al*, 1999). Thus, *chp-1(lf)* enhanced the Vul phenotype  
271 caused by apical receptor mislocalization. Interestingly, the Muv phenotype caused by the *n1046*  
272 gain-of-function (*gf*) mutation in the *let-60 ras* gene (Beitel *et al*, 1990) was significantly enhanced  
273 by *chp-1(lf)* (**Fig. 4J-L**). This apparent paradox may be explained by reduced LIN-3 EGF sequestering  
274 in the proximal VPC P6.p of *chp-1(lf)* mutants. Similar to the apical mislocalization in *lin-2(lf)*  
275 mutants, the intracellular mislocalization of LET-23 in *chp-1(lf)* mutants likely results in decreased  
276 ligand binding by P6.p, allowing in the diffusion of more LIN-3 signal to distal VPCs and their  
277 induction in the hyper-sensitive *let-60(n1046gf)* background (Hajnal *et al*, 1997).

278 In summary, our genetic analysis indicated that *chp-1* positively regulates EGFR/RAS/MAPK  
279 signaling in the VPCs. However, the VPCs in *chp-1(lf)* mutants can differentiate into vulval cells  
280 because they remain partially sensitive to the inductive LIN-3 EGF signal.

281

## 282 **CHP-1 is necessary for the precise AC to P6.p alignment**

283 Besides VPC fate specification, LIN-3 to LET-23 signaling is also required for the proper alignment  
284 between the AC and the 1° VPC P6.p (Grimbert *et al*, 2016). In wild-type L2 stage larvae, the relative  
285 position between the AC and VPCs is highly variable. However, by the early L3 stage the 1° VPC P6.p  
286 has migrated towards the AC such that the AC and P6.p are precisely aligned with each other.  
287 Thereafter, the VPCs begin to proliferate and the AC remains aligned with the 1° VPC descendants. In

Haag et al.

288 wild-type mid-L3 larvae after the VPCs had undergone two rounds of cell divisions, the AC was  
289 located at the vulval midline above the two inner 1° P6.p descendants (the VulF cells) (**Fig. 4M,M'**).  
290 By contrast, in *chp-1(lf)* mutants the AC was often misplaced and occasionally located between VulF  
291 and VulE (**Fig. 4N,N**). To quantify the AC to VulF alignment, we measured the distance between the  
292 AC nucleus and the midpoint between the two VulF cells at the Pn.pxx stage. In most *chp-1(lf)/+*  
293 heterozygous control animals, the AC to mid-VulF distance was around 1  $\mu\text{m}$  or smaller, while most  
294 *chp-1(lf)* mutants exhibited a distance greater than 1  $\mu\text{m}$  (**Fig. 4O**).

295 Thus, in addition to VPC fate specification *chp-1* is also required for the precise alignment between  
296 the AC and the VPCs mediated by LIN-3/LET-23 signaling.

297

### 298 **Human CHORDC1 is required for filopodia formation and sustained ERK1/2 activation by EGF**

299 To examine if the role of CHP-1 in controlling EGFR localization and signaling is conserved in  
300 mammalian cells, we performed a CRISPR/Cas9-mediated knock-out of the mammalian *chp-1*  
301 homolog CHORDC1 in cultured cells. We used the human vulva epidermoid carcinoma cell line A431  
302 because the cells express high levels of wild-type EGFR and respond strongly to EGF stimulation (Van  
303 de Vijver *et al*, 1991). A431 cells were transduced with lentiviral particles that deliver Cas9 and two  
304 sgRNAs targeting the first exon of CHORDC1 (see materials and methods). As negative control, cells  
305 were transduced with a lentivirus delivering a scrambled sgRNA. After bulk puromycin selection to  
306 eliminate uninfected cells, two cell populations were generated, subsequently termed A431 KO and  
307 A431 control cells, respectively. Western blot analysis revealed a 96% reduction of CHORDC1 protein  
308 levels in A431 KO cells (**Fig. 5A**).

309 A431 KO cells displayed a reduced growth rate and a tendency to grow in smaller, scattered patches  
310 when compared to A431 control cells (**Fig. 5B,C**). Furthermore, loss of CHORDC1 resulted in cell  
311 lethality approximately 16 days post lentiviral transduction, which made it impossible to establish  
312 A431 KO lines from single cell clones. Therefore, the following experiments were performed with  
313 populations of A431 KO and control cells 10 to 14 days post lentiviral transduction. To further  
314 characterize the morphological defects of A431 KO cells, we visualized the actin cytoskeleton by  
315 phalloidin staining. The numerous F-actin rich filopodia protruding from the plasma membrane of  
316 A431 control cells were absent in A431 KO cells (**Fig. 5D,E**). Instead, A431 KO cells contained densely  
317 packed cortical F-actin filaments arranged in a circumferential manner. A similar phenotypic switch  
318 was observed after treatment of A431 cells with the Hsp90 inhibitor geldanamycin (GA) (**Fig. 5F**)  
319 (Ahsan *et al*, 2012; Gano & Simon, 2010b).

Haag et al.

320 Since EGFR signaling induces the remodeling of the actin cytoskeleton in migratory cells (Appert-  
321 Collin *et al*, 2015), we tested if the absence of filopodia in A431 KO cells might be due to reduced  
322 EGFR signaling. Serum starvation of A431 control cells caused a strong reduction in filopodia  
323 formation (**Fig. 5G**), but stimulation with EGF induced the reappearance of actin-rich filopodia within  
324 10 minutes (**Fig. 5G'**). By contrast, EGF stimulation of serum starved A431 KO cells did not induce  
325 filopodia formation (**Fig. 5H, H'**).

326 To directly measure the activity of the EGFR/RAS/MAPK pathway, we quantified ERK1/2 activity  
327 after EGF stimulation of serum starved cells using a phospho-ERK1/2 specific antibody to probe  
328 Western blots of total cell lysates (Gabay *et al*, 1997). In A431 control cells, phospho-ERK1/2 levels  
329 reached the maximum levels 5 minutes after EGF stimulation and declined almost to baseline levels  
330 within 30 minutes (**Fig. 5I**). The total ERK1/2 levels did not change during the EGF stimulation. By  
331 contrast, phospho-ERK1/2 levels in A431 KO cells increased to around half of the maximal levels  
332 observed in A431 KO cells and decreased more rapidly.

333 Taken together, our results show that the human CHP-1 homolog CHORDC1 is required for EGF-  
334 induced filopodia formation and sustained ERK1/2 activation in A431 cells. Analogous to the results  
335 obtained for *C. elegans chp-1*, loss of CHORDC1 function does not eliminate but rather attenuates  
336 EGFR signaling in A431 cells.

337

### 338 **CHORDC1 controls the sub-cellular localization and stability of the EGFR**

339 Since *chp-1* is required for the membrane localization of the LET-23 EGFR in *C. elegans*, we  
340 investigated if CHORDC1 also regulates EGFR localization in A431 cells. We analyzed receptor  
341 localization by immunofluorescence staining of fixed cells with an antibody against the extracellular  
342 domain of the EGFR. In A431 control cells, most of the EGFR signal was detected together with the  
343 actin-rich filopodia at the cell cortex, whereas only a small amount of EGFR staining was detected  
344 inside the cells (**Fig. 6A**). In A431 KO cells, on the other hand, most of the EGFR staining was observed  
345 in intracellular punctae (**Fig. 6B**). Orthogonal xz-projections through the cells revealed that most of  
346 the EGFR staining in A431 control cells overlapped with the cortical actin signal, while in A431 KO  
347 cells part of the signal was detected inside the cells and a fraction near the cortex underneath the  
348 cortical actin (**Fig. 6A'-B'**). Moreover, A431 KO cells appeared significantly flatter than A431 control  
349 cells.

350 To examine if the loss of CHORDC1 results in a similar mislocalization of the EGFR to the ER as in *C.*  
351 *elegans chp-1(lf)* mutants, we co-stained the cells with antibodies against the EGFR and the ER

Haag et al.

352 marker PDI (protein disulfide isomerase) (Jaronen *et al*, 2013). While in A431 control cells only 5%  
353 of the EGFR signal colocalized with the PDI marker, 51% of the EGFR signal in the A431 KO cells  
354 overlapped with the PDI staining (**Fig. 6C-E**).

355 Since CHORDC1 has been reported to act as a co-chaperone (Gano & Simon, 2010a), we hypothesized  
356 that loss of CHORDC1 function might result in the incorrect folding of the EGFR and thereby cause its  
357 accumulation in the ER. To test this hypothesis, we performed trypsin sensitivity assays of the EGFR  
358 in A431 control versus KO cells. Since misfolded proteins are usually more susceptible to trypsin  
359 degradation, this assay can detect changes in protein folding (Ninagawa *et al*, 2015). Total protein  
360 extracts of A431 control and KO cells were incubated with varying concentrations of trypsin, and the  
361 amount of full-length EGFR was quantified by Western blotting. As internal control, the EGFR signal  
362 intensities were normalized to the tubulin levels in the same lysates, as tubulin was degraded at  
363 approximately the same rate in the two cell populations. This assay revealed a faster degradation and  
364 thus an increased trypsin sensitivity of the EGFR in A431 KO cells(**Fig. 6F**).

365 Consistent with earlier reports (Ahsan *et al*, 2012), we observed that the inhibition of HSP90 by  
366 geldanamycin caused an approximately two-fold reduction in total EGFR levels (**Fig. 6G**). By contrast,  
367 loss of CHORDC1 (A431 KO) cells only resulted in a 20% reduction in EGFR levels. Surprisingly,  
368 geldanamycin treatment of A431 KO cells caused a further reduction below the EGFR levels detected  
369 in geldanamycin-treated A431 control cells, indicating that HSP90 stabilizes the EGFR independently  
370 of CHORDC1.

371 Taken together, we have found that the EGFR accumulates in the ER of A431 cells lacking CHORDC1,  
372 analogous to the mislocalization of LET-23 in *C. elegans chp-1(lf)* mutants. The increased trypsin  
373 sensitivity of the mislocalized EGFR in CHORDC1 mutant cells could be due to incorrect protein  
374 folding. Notably, CHORD1 and HSP90 appear to influence EGFR stability through distinct  
375 mechanisms.

376

## 377 **Discussion**

378 Intercellular signal transduction is regulated by the production and secretion of growth factors in the  
379 signal sending cells, as well as by the sub-cellular localization and intracellular trafficking of their  
380 receptors in the signal receiving cells (Sorkin & Goh, 2009). We have used vulval development in *C.*  
381 *elegans* as an in vivo model to identify new factors regulating the secretion and localization of the  
382 EGFR homolog LET-23 (Haag *et al*, 2014). The basolateral localization and retention of LET-23 is  
383 essential for the efficient activation of the downstream RAS/MAPK pathway and correct VPC

Haag et al.

384 differentiation. Perturbations in LET-23 secretion or localization invariably cause defects in VPC fate  
385 specification and abnormal vulval morphogenesis.

386 In a screen for genes regulating LET-23 localization we have previously identified the CHORD-  
387 containing protein CHP-1 as a regulator of LET-23 EGFR trafficking in the VPCs (Haag *et al*, 2014).  
388 Here, we show that the loss of *chp-1* function in *C. elegans* leads to the accumulation of LET-23 in the  
389 ER and a strong reduction -but not a complete inactivation- of RAS/MAPK signaling in the VPCs. Even  
390 in the absence of CHP-1 a small fraction of LET-23 reaches the plasma membrane, where it can bind  
391 to and be activated by the normally limiting amounts of LIN-3 EGF. Our genetic analysis confirms the  
392 notion that vulval induction in *chp-1(lf)* mutants depends to a large extent on *lin-3* activity. However,  
393 the ER accumulation of LET-23 in *chp-1(lf)* mutants is independent of *lin-3* or the basolateral *lin-*  
394 *2/lin-7/lin-10* receptor localization complex. This indicates that CHP-1 controls LET-23 secretion in  
395 the VPCs at an earlier step, before the receptor interacts with LIN-7 at the plasma membrane and  
396 undergoes LIN-3-mediated endocytosis.

397 In order to test if the function of CHP-1 in the EGFR signaling pathway is conserved in mammals, we  
398 inactivated the CHP-1 homolog CHORDC1 in human A431 epidermoid carcinoma cells, which express  
399 high levels of the wild-type EGFR and undergo a phenotypic switch in response to EGF stimulation  
400 (Ferretti *et al*, 2011; Van de Vijver *et al*, 1991). The phenotype of the CHORDC1 knock-out in A431  
401 cells is remarkably similar to the *chp-1(lf)* phenotype in the *C. elegans* VPCs; the EGFR accumulates  
402 in the ER and the activation of the RAS/MAPK pathway in response to EGF stimulation is strongly  
403 reduced. Even though the total levels of the EGFR are only slightly reduced CHORDC1 mutant A431  
404 cells, the EGFR is less stable as it exhibits an increased sensitivity to trypsin digestion (Ninagawa *et*  
405 *al*, 2015). Possibly, CHORDC1 is required for the correct folding of the EGFR as it enters the ER and  
406 the partially unfolded EGFR molecules cannot pass through the ER. Our current data do not  
407 distinguish whether CHORDC1 is required for the ER entry or exit of the EGFR. However, the  
408 extracellular domain of the EGFR is N-glycosylated at multiple sites after entry into the ER lumen and  
409 further modified in the Golgi network to produce a mature glycoprotein with a molecular weight of  
410 170 Kilodaltons (kDa), as opposed to the 130 kDa native, non-glycosylated polypeptide (Azimzadeh  
411 Irani *et al*, 2017). Since we did not observe a shift in the electrophoretic mobility of the EGFR in A431  
412 KO cells, it appears that the EGFR is at least partially glycosylated and hence can enter the ER without  
413 CHORDC1.

414 Several observations have indicated that the role of *C. elegans* CHP-1 in LET-23 EGFR trafficking is  
415 rather specific. First, if CHP-1 was required for the ER trafficking of a large number of proteins, this  
416 would result in ER stress and activate the UPR pathway (Calton *et al*, 2002). Yet, *chp-1(lf)* mutants do

Haag et al.

417 not exhibit an increased activity of the UPR pathway, unless additional ER stress is induced by  
418 globally inhibiting protein glycosylation. Second, the membrane localization of three other type I  
419 trans-membrane receptors we examined (LIN-12 NOTCH, PAT-3  $\beta$ -integrin and LIN-18 RYK) does  
420 not depend on *chp-1*. Third, inhibition of other known HSP90 co-chaperones, such as *cdc-37*, *daf-41*  
421 and *sgt-1*, does not affect LET-23 localization in the VPCs.

422 It has been proposed that CHORDC1 acts as a co-chaperone that assists HSP90 in the folding of its  
423 numerous client proteins (Gano & Simon, 2010a). According to this model, CHORDC1 would confer  
424 the specificity of HSP90 towards a subset of its clients, among them the EGFR. Surprisingly, our data  
425 point at an HSP90-independent function of CHP-1/ CHORDC1 in EGFR trafficking. The strongest  
426 viable allele of *daf-21*, which encodes the *C. elegans* HSP90 ortholog, did not perturb LET-23  
427 membrane localization, though the expression levels of LET-23 in the VPCs of *daf-21(rf)* mutants  
428 were reduced. On the other hand, the vulval cells of *chp-1(lf)* mutants did not exhibit an obvious  
429 reduction in LET-23 expression. We made analogous observations using human A431 cells. The  
430 treatment of A431 cells with the HSP90 inhibitor geldanamycin caused a strong reduction in total  
431 EGFR protein levels, while loss of CHORDC1 only caused a slight (20%) reduction in total EGFR levels.  
432 Since geldanamycin treatment reduced EGFR levels even in CHORDC1 deficient cells, CHORDC1 likely  
433 functions independently of HSP90. The CDC37/HSP90 co-chaperone/chaperone complex interacts  
434 with the nascent EGFR and may assist in its folding (Verba & Agard, 2017), whereas CHORDC1 might  
435 promote the maturation and trafficking of EGFR independently of HSP90. Furthermore, many co-  
436 chaperones can act independently of their core chaperones. For example, p23, which contains the  
437 same ACD (alpha-crystallin-Hsps\_p23-like) domain as CHORDC1, regulates various cellular  
438 processes that are distinct from those controlled by HSP90 (Echtenkamp et al, 2011). It is therefore  
439 possible that CHORDC1 acts by itself or in a complex with another member of the large heat shock  
440 protein family. For example, the glucose-regulated protein 94 (GRP94), an HSP90 paralog localized  
441 in the ER, regulates the intracellular trafficking of Toll-like receptors (Randow & Seed, 2001). It thus  
442 remains to be tested whether CHORDC1 acts in a complex with GRP94 or other chaperones.

443 A number of clinical trials have tested HSP90 inhibitors for the treatment of human cancer,  
444 geldanamycin being among the first generation of HSP90 inhibitors used (Garcia-Carbonero *et al*,  
445 2013). However, due to the large number of HSP90 clients the use of these inhibitors in patients has  
446 been limited by the many side effects they cause. The identification of CHORDC1 as a more specific  
447 regulator of EGFR trafficking opens the possibility to develop small molecule chaperone inhibitors  
448 targeting the EGFR pathway with a higher selectivity and fewer side effects.

449

Haag et al.

## 450 **Materials and Methods**

### 451 **General *C. elegans* methods and strains**

452 Unless specified otherwise, *C. elegans* strains were maintained at 20 °C on Nematode Growth Medium  
453 (NGM) agar plates as described (Brenner, 1974). The *C. elegans* Bristol N2 strain was used as wild-  
454 type reference, and all strains generated through genetic crosses were derived from N2. A complete  
455 list of the *C. elegans* strains used can be found in **suppl. Table S1**.

### 456 **RNAi feeding method**

457 RNAi feeding experiments were performed as described previously (Kamath & Ahringer, 2003). The  
458 strain of interest was fed with *E. coli* HT115 expressing dsRNA against a specific target mRNA. 20  
459 synchronized L1 larvae were transferred to NGM plates containing 3 mM IPTG and 50ng/ml  
460 ampicillin seeded with the indicated RNAi bacteria. The F1 progeny of the 20 P0 animals was  
461 analyzed at the L3 stage to score LET-23::GFP localization or at the L4 stage to examine vulval  
462 induction.

### 463 **Vulval induction**

464 Vulval induction was scored by examining 20-40 worms of the indicated genotypes at the L4 stage  
465 under Nomarski optics. Animals were mounted on 4% agarose pads and anesthetized with 20 mM  
466 tetramisole in M9 buffer as described (Sternberg & Horvitz, 1986; Schmid *et al*, 2015). The vulval  
467 induction index (VI) was scored by counting the induced VPCs in 20-40 animals and calculating the  
468 average number of induced VPCs per animal. Statistical analysis is described in the legend to **Fig. 4**.

### 469 **Tunicamycin treatment**

470 The tunicamycin treatment to induce ER stress was carried out as described in (Taylor & Dillin,  
471 2013). Briefly, animals expressing the *hsp-4::gfp* reporter were synchronized at the L1 stage and  
472 allowed to develop on NGM plates until the first day of adulthood. Then, they were incubated for 4  
473 hours at room temperature in 25 µg/ml tunicamycin solution in M9 buffer. Control animals were  
474 incubated in an equivalent dilution of DMSO, which was used as a solvent for tunicamycin. After the  
475 treatment, HSP-4::GFP expression was observed with a 10x lens on a Leica DM RA wide-field  
476 microscope. Images were analyzed using Fiji software (Schindelin *et al*, 2012), and the average  
477 intensity of the whole body in each animal was measured to make the box plot in **suppl. Fig S3**.

### 478 **Generation of the SP12 ER and AMAN-2 Golgi reporters**

479 Plasmid constructs were made using Gibson Assembly cloning (Gibson *et al*, 2009) and verified by  
480 DNA sequencing. A list of the oligonucleotide primers used for plasmid construction can be found in



Haag et al.

481 **suppl. Table S2.** To construct plasmid pAHE3 (*Pdlg-1::aman-2::mCherry::unc-54 3'UTR*, the plasmid  
482 the pCFJ151 backbone (Frøkjær-Jensen *et al*, 2008) was recombined with the *Pdlg-1* promoter and  
483 the *unc-54 3'* UTR, amplified as two individual fragments using the primers OEH153& OEH158 and  
484 OEH159& OEH156. The *aman-2* (F58H1.1) genomic sequence encoding the first 82 amino acids,  
485 including the signal sequence and trans-membrane anchor, amplified from genomic DNA using the  
486 primers OEH152& OEH155, and the mCherry coding sequence, amplified with the primers OEH154&  
487 OEH157, were then inserted after the *Pdlg-1* promoter.

488 To construct pAHE6 (*Pdlg-1::mCherry::C34B2.10(SP12)::unc-54 3'UTR*), the pCFJ151 backbone  
489 (Frøkjær-Jensen *et al*, 2008) was recombined with the *Pdlg-1* promoter and the *unc-54 3'* UTR,  
490 amplified as two individual fragments using the primers OAHE22& OEH159 and OEH158& OEH153.  
491 The mCherry coding sequence, amplified with the primers OAHE19 & OAHE20, and the genomic  
492 sequence of C34B2.10 (SP12) containing the stop codon, amplified with the primers OAHE21&  
493 OAHE8, were then inserted after the *Pdlg-1* promoter. The primer OAHE21 contained an additional  
494 linker sequence encoding three Alanines for the N-terminal fusion with mCherry. For each of the two  
495 reporter plasmids, single copy insertion transgenes were generated by the MosSCI method as  
496 described (Frøkjær-Jensen *et al*, 2008).

#### 497 **VPC-specific *chp-1* CRISPR/CAS9**

498 Two target sites in the first exon of the genomic *chp-1* locus (sgRNA #1: CAG TGC TAT CAT AAA GGA  
499 TG and sgRNA #2 CGG TCT CCT TTT CGA TCC CA) were identified using the CRISPR design tool  
500 (<http://crispr.mit.edu/>) (Hsu *et al*, 2013). Double-stranded oligonucleotides were synthesized and  
501 cloned into the pDD162 (Addgene) to produce pAHE4 (sgRNA #1) and pAH5 (sgRNA #2). Plasmid  
502 pEV5 (*Pegl-17-Dpes-10::cas9*) (gift by Evelyn Lattmann) was used for 1° VPC-specific expression of  
503 the CAS9 protein. The plasmids pAHE4 and pAHE5 were co-injected into the gonads of wild-type  
504 animals as described (Mello *et al*, 1991) at a concentration of 50 ng/μl each together with the plasmid  
505 pEV5 at 100 ng/μl and the transformation markers pGH8 (*Prab-3::mCherry*) at 10 ng/ μl, pCFJ104  
506 (*Pmyo-3::mCherry*) at 5 ng/μl and the pCFJ90 (*Pmyo-2::mCherry*) at 2.5 ng/μl to create the  
507 extrachromosomal array *zhEx558*.

#### 508 **Mammalian Cell Culture**

509 The human vulva epidermoid carcinoma cell line A431 was obtained from Sigma Aldrich (85090402)  
510 and cultured in Dulbecco's Modified Eagle Medium (Gibco 41966-029) according to standard  
511 mammalian tissue culture protocols and sterile technique. DMEM was supplemented with 10% FCS  
512 (Gibco 10500-064) and 1% Pen-Strep (Gibco 15140-122).

Haag et al.

### 513 **CHORDC1 knock-out in A431 cells**

514 CHORDC1 guide RNAs targeting the first exon of CHORDC1 (CHORDC1 sgRNA #1: TTA CCG TCG GAA  
515 TTG GTC TC and CHORDC1 sgRNA #2: AGA CCA ATT CCG ACG GTA AG), as well as the scramble  
516 sequence GCA CTA CCA GAG CTA ACT CA, were identified using the CRISPR Design Tool  
517 (<http://crispr.mit.edu/>) (Hsu *et al*, 2013). Double-stranded oligos were generated and cloned into  
518 the lentiCRISPRv2 vector (Addgene), which was then transfected in combination with pVSV-G, pMDL  
519 and pREV into HEK293T cells to produce lentiviral particles (vMW6\_CHORDC1 sg#1,  
520 vMW7\_CHORDC1 sg#2, vMW9\_scramble). Four days following transfection, the media from cells was  
521 collected, clarified by centrifugation, and filtered through a 0.45 µM filter to collect lentiviral  
522 particles. Subsequently, the particles were concentrated in Amicon Ultra tubes (Ultracel 100k,  
523 Millipore). The titer of viral particles was determined before vMW6\_CHORDC1 sg#1 and  
524 vMW7\_CHORDC1 sg#2 were used to transduce 180'000 A431 cells in a 12-well plate at a combined  
525 MOI of 10. A431 cells were supplemented with DMEM media containing the lentiviral mix and 10  
526 µg/ml polybrene and cultured under normal conditions. In parallel, cells were transduced with  
527 vMW9\_scramble at a MOI of 10. Three days after transduction, cells were grown in the presence of  
528 1.2 µg/ml puromycin. One week after puromycin selection, the puromycin-resistant populations  
529 were frozen and kept as stocks used in the subsequent experiments.

### 530 **Western blotting**

531 For Western blot analysis, cells were lysed in lysis buffer on ice (100 mM Tris/HCl, 150 mM NaCl, 1  
532 % Triton X, 1 mM EDTA, 1mM DTT, 10 ml lysis buffer + 1 tablet protease inhibitor), scraped with a  
533 cell scraper and snap frozen in liquid nitrogen. 100 µl of this mix was sonicated in a Bioruptor  
534 sonicator device (Diagenode), before 100 µl of 2x SDS loading dye were added. About 10 µg of protein  
535 extract were resolved by SDS-PAGE and transferred to nitrocellulose membrane. The membrane was  
536 blocked in 5% dried milk in 1x PBS plus 0.2% Tween 20 and then incubated with the diluted primary  
537 antibodies overnight at 4°C. Secondary anti-rabbit or anti-mouse IgG antibodies conjugated to  
538 horseradish peroxidase (HRP) were used as the secondary antibodies. The HRP was detected by  
539 incubating the membrane with the SuperSignal West Pico or Dura Chemiluminescent Substrate  
540 (Thermo Scientific) for 4 minutes, before the signals were measured on a digital Western blot  
541 imaging system. The antibodies used for Western blot analysis were: anti-CHORDC1 (HPA041040  
542 Atlas Antibodies), anti-Tubulin (ab18251 abcam), anti-EGFR (HPA018530 Atlas Antibodies), anti-  
543 ERK1/2 (M5670 Sigma Aldrich), anti-ERK1/2 activated (M8159, Sigma Aldrich), HRP anti-Rabbit  
544 (111-035-144 Jackson Immuno Research) and HRP anti-Rabbit (115-035-146 Jackson Immuno  
545 Research). Quantification of Western blots was done by measuring the band intensities in Fiji.

Haag et al.

#### 546 **Immunofluorescence staining of A431 cells**

547 Cells were grown on glass slides in 24-well plates under standard conditions for 48 hrs. Slides were  
548 then rinsed in PBS and fixed for 15 min in 4% PFA at 37°C. After washing with PBS, cells were  
549 permeabilized with PBS containing 0.2% Triton X-100 and 0.5% BSA for 5 min, and then blocked for  
550 1 hour in PBS containing 0.5% BSA and 0.2% gelatine. Primary antibodies were added in blocking  
551 solution for 1 hour at room temperature in a humid chamber. The cells were rinsed in PBS three  
552 times before being incubated for 40 minutes in the dark with secondary antibodies and Phalloidin  
553 568 (B3475 Thermo Scientific). After three washes with PBS, cells were stained for 5 minutes with  
554 PBS containing 0.1 µg/ml DAPI, followed by three washes with PBS. Glass slides were mounted with  
555 ProLong Gold Antifade Mountant (Thermo Scientific). The antibodies used for immunocytochemistry  
556 were: anti-CHORDC1 (HPA041040 Atlas Antibodies), anti-Tubulin (ab18251 abcam), anti-EGFR  
557 (MA5-13269 Thermo Scientific), anti-PDI (MA3-019 Thermo Scientific), Alexa Fluor 488 (A11034  
558 Thermo Scientific), and Alexa Fluor 647 (A21236 Thermo Scientific). For all antibody stainings, at  
559 least three biological replicates were made.

#### 560 **EGF stimulation**

561 250'000 A431 cells were grown in 12-well plates under standard conditions for 24 hrs. Thereafter,  
562 growth medium was replaced with DMEM lacking FCS. After 15 hours of starvation, cells were  
563 stimulated with 100 ng/ml human EGF (E9644 Sigma) for 10 minutes at 37°C, before they were lysed  
564 and prepared for western blot analysis.

#### 565 **Trypsin Sensitivity Assay**

566 750'000 A431 cells were seeded into a 25cm<sup>2</sup> flask and grown until they reached confluency. After  
567 washing twice with cold PBS, cells were scraped with a cell scraper, lysed in lysis buffer (100mM Tris  
568 pH=8, 1% NP-40, 150 mM NaCl, 1 mM DTT) for 10 min on ice, sonicated for 10 min at 4°C, and  
569 clarified by centrifugation at 17,000 x g for 10min at 4°C. Aliquots containing 50 µg of cleared protein  
570 samples were incubated with 0.1, 0.15, 0.2, 0.4, 0.6, 0.8, 1, 1.25 and 1.5 µg/ml Trypsin (Sigma  
571 EMS0004) and incubated for 15 min at 25°C while shaking. Thereafter, 2x SDS loading dye was added  
572 and samples were boiled prior to resolving the proteins by SDS-PAGE.

#### 573 **Wide-field fluorescence microscopy**

574 To examine the expression pattern of fluorescently tagged proteins, a Leica DM RA wide-field  
575 microscope equipped with a Hamamatsu ORCA-ER camera using a 40x /1.3 NA or 63x/1.4 NA oil  
576 immersion objective was used. Fluorescent and Nomarski images were acquired with the Openlab 4.0  
577 or VisiView 2.1 software. To observe the localization of GFP reporters, around 40 worms at the L3

Haag et al.

578 stage were mounted on 4% agarose pads and anesthetized with 20 mM tetramisole in M9 buffer. In  
579 each experiment, the intensity of the light source, the exposure time and the software settings were  
580 kept constant.

### 581 **Confocal laser scanning microscopy**

582 Around 40 larvae at the Pn.p to Pn.pxx stage were mounted on 4% agarose pads in M9 buffer  
583 containing 2 mM tetramisole. z-stacks at 0.2 to 0.3  $\mu\text{m}$  spacing were taken using a Plan-Apochromat  
584 63x/1.4 NA oil immersion objective on a Zeiss LSM710 confocal laser scanning microscope equipped  
585 with an 458/488/514 nm argon laser and a 594 nm helium-neon laser. Images were acquired by  
586 using the LSM710 ZEN 2012 software (Zeiss). GFP was excited with a 488 laser excitation and  
587 emission was detected in a range of 493-566 nm. mCherry was excited with a 594 nm laser excitation  
588 and emission was detected in a range of 599-696 nm. Images were captured with a variable frame  
589 size, a pinhole equivalent to 1 Airy and a pixel size of 0.08  $\mu\text{m}$ . Identical camera gain settings were  
590 used for all live animal imaging (AMAN-2::mCherry: GFP 600, mCherry 500/ mCherry::SP12: GFP  
591 600, mCherry 600). Images of antibody-stained A431 cells (**Figs. 5 & 6**) were taken on a Leica CLSM  
592 SP8 upright microscope equipped with 405/488/552/638 nm solid state diode lasers. z-stacks at  
593 0.16  $\mu\text{m}$  spacing were taken using a 63x/1.4 HCX PL APO CS2 oil immersion objective with a variable  
594 frame size and a pinhole equivalent to 1 Airy.

595

### 596 **Image processing Quantification of co-localization**

597 Images were analyzed and processed with Fiji software (Schindelin *et al*, 2012) to adjust brightness  
598 and contrast. Images in **Figs. 2, 5 & 6** were deconvolved using the Huygens deconvolution software  
599 (Scientific Volume imaging). To quantify co-localization in **Figs. 2 & 6**, raw images (without  
600 deconvolution) were processed in Fiji using the Subtract Background command (default settings,  
601 rolling ball radius=0.3). To quantify co-localization, z-stacks were analyzed with the ImarisColoc  
602 module in Imaris 8.3. (Bitplane). The GFP channel of each image was thresholded to define a ROI  
603 using the masking channel function. An automatic threshold implemented in Imaris was set for both  
604 channels based on a statistical significance algorithm (Costes *et al*, 2004). With this approach, the  
605 extent of co-localization of two fluorescent-labeled proteins in an image is automatically quantified,  
606 without the bias of visual interpretation. Based on an automatically identified threshold calculated  
607 by the Coste's approach, a Manders Colocalization Coefficient (MCC) indicating the fraction of total  
608 probe fluorescence that co-localizes with the fluorescence of a second probe was calculated  
609 (Manders *et al*, 2011). The calculated MCC values were averaged, and statistical analysis was  
610 performed using a two-tailed Student's t-test for independent samples.

Haag et al.

611

612 **Acknowledgements**

613 We wish to thank the members of the Hajnal laboratory for critical discussion and comments on the  
614 manuscript. We are also grateful to the *C. elegans* Genetics Center CGC, which is funded by NIH Office  
615 of Research Infrastructure Programs (P40 OD010440), the Mitani lab (National Bioresource Project)  
616 for providing some strains, Andrew Fire for GFP vectors, J. Ahringer for RNAi clones and Franziska  
617 Walser and Marco Wachtel for their expertise in the production of lentiviral particles. Confocal  
618 imaging was performed with support of Urs Ziegler at the Center for Microscopy and Image Analysis,  
619 University of Zurich. This work was supported by a grant from the Swiss National Science Foundation  
620 to A.H. no. 31003A-166580 and the Kanton of Zürich.

621

622 **The authors declare no competing interests.**

623

624

Haag et al.

625 **References**

- 626 Ahsan A, Ramanand SG, Whitehead C, Hiniker SM, Rehemtulla A, Pratt WB, Jolly S, Gouveia C, Truong  
627 K, Waes CV, Ray D, Lawrence TS & Nyati MK (2012) Wild-type EGFR Is Stabilized by Direct Interaction  
628 with HSP90 in Cancer Cells and Tumors. *Neoplasia* **14**: 670–IN1
- 629 Appert-Collin A, Hubert P, Crémel G & Bennisroune A (2015) Role of ErbB Receptors in Cancer Cell  
630 Migration and Invasion. *Front Pharmacol* **6**: 283
- 631 Azimzadeh Irani M, Kannan S & Verma C (2017) Role of N-glycosylation in EGFR ectodomain ligand  
632 binding. *Proteins* **85**: 1529–1549
- 633 Beitel GJ, Clark SG & Horvitz HR (1990) Caenorhabditis elegans ras gene let-60 acts as a switch in the  
634 pathway of vulval induction. **348**: 503–509
- 635 Berset T, Hoier EF, Battu G, Canevascini S & Hajnal A (2001) Notch inhibition of RAS signaling through  
636 MAP kinase phosphatase LIP-1 during C. elegans vulval development. *Science* **291**: 1055–1058
- 637 Birnby DA, Link EM, Vowels JJ, Tian H, Colacurcio PL & Thomas JH (2000) A transmembrane guanylyl  
638 cyclase (DAF-11) and Hsp90 (DAF-21) regulate a common set of chemosensory behaviors in  
639 caenorhabditis elegans. *Genetics* **155**: 85–104
- 640 Brancaccio M, Menini N, Bongioanni D, Ferretti R, De Acetis M, Silengo L & Tarone G (2003) Chp-1  
641 and melusin, two CHORD containing proteins in vertebrates. *FEBS Lett* **551**: 47–52
- 642 Brenner S (1974) The genetics of Caenorhabditis elegans. *Genetics* **77**: 71–94
- 643 Bryant DM & Mostov KE (2008) From cells to organs: building polarized tissue. *Nat Rev Mol Cell Biol*  
644 **9**: 887–901
- 645 Burdine RD, Branda CS & Stern MJ (1998) EGL-17(FGF) expression coordinates the attraction of the  
646 migrating sex myoblasts with vulval induction in C. elegans. *Development* **125**: 1083–1093
- 647 Calfon M, Zeng H, Urano F, Till JH, Hubbard SR, Harding HP, Clark SG & Ron D (2002) IRE1 couples  
648 endoplasmic reticulum load to secretory capacity by processing the XBP-1 mRNA. *Nature* **415**: 92–  
649 96
- 650 Chen CC-H, Schweinsberg PJ, Vashist S, Mareiniss DP, Lambie EJ & Grant BD (2006) RAB-10 is  
651 required for endocytic recycling in the Caenorhabditis elegans intestine. *Mol Biol Cell* **17**: 1286–1297
- 652 Citri A & Yarden Y (2006) EGF–ERBB signalling: towards the systems level. *Nat Rev Mol Cell Biol* **7**:  
653 505–516
- 654 Costes SV, Daelemans D, Cho EH, Dobbin Z, Pavlakis G & Lockett S (2004) Automatic and quantitative

Haag et al.

- 655 measurement of protein-protein colocalization in live cells. *Biophys. J.* **86**: 3993–4003
- 656 Echtenkamp FJ, Zelin E, Oxelmark E, Woo JI, Andrews BJ, Garabedian M & Freeman BC (2011) Global  
657 functional map of the p23 molecular chaperone reveals an extensive cellular network. *Mol Cell* **43**:  
658 229–241
- 659 Ferretti R, Sbroggiò M, Di Savino A, Fusella F, Bertero A, Michowski W, Tarone G & Brancaccio M  
660 (2011) Morgana and melusin: Two fairies chaperoning signal transduction. *Cell Cycle* **10**: 3678–3683
- 661 Frøkjær-Jensen C, Davis MW, Hopkins CE, Newman BJ, Thummel JM, Olesen S-P, Grunnet M &  
662 Jorgensen EM (2008) Single-copy insertion of transgenes in *Caenorhabditis elegans*. *Nat. Genet.* **40**:  
663 1375–1383
- 664 Gabay L, Seger R & Shilo BZ (1997) In situ activation pattern of *Drosophila* EGF receptor pathway  
665 during development. *Science* **277**: 1103–1106
- 666 Gano JJ & Simon JA (2010) A proteomic investigation of ligand-dependent HSP90 complexes reveals  
667 CHORDC1 as a novel ADP-dependent HSP90-interacting protein. *Molecular & cellular proteomics :  
668 MCP* **9**: 255–270
- 669 Garcia-Carbonero R, Carnero A & Paz-Ares L (2013) Inhibition of HSP90 molecular chaperones:  
670 moving into the clinic. *The Lancet. Oncology* **14**: e358–69
- 671 Gibson DG, Young L, Chuang R-Y, Venter JC, Hutchison CA & Smith HO (2009) Enzymatic assembly of  
672 DNA molecules up to several hundred kilobases. *Nat Meth* **6**: 343–345
- 673 Grimbert S, Tietze K, Barkoulas M, Sternberg PW, Félix M-A & Braendle C (2016) Anchor cell signaling  
674 and vulval precursor cell positioning establish a reproducible spatial context during *C. elegans* vulval  
675 induction. *Dev Biol* **416**: 123–135
- 676 Haag A, Gutierrez P, Bühler A, Walser M, Yang Q, Langouët M, Kradolfer D, Fröhli E, Herrmann CJ,  
677 Hajnal A & Escobar-Restrepo JM (2014) An In Vivo EGF Receptor Localization Screen in *C. elegans*  
678 Identifies the Ezrin Homolog ERM-1 as a Temporal Regulator of Signaling. *PLoS Genet* **10**: e1004341
- 679 Hagedorn EJ, Yashiro H, Ziel JW, Ihara S, Wang Z & Sherwood DR (2009) Integrin acts upstream of  
680 netrin signaling to regulate formation of the anchor cell's invasive membrane in *C. elegans*. **17**: 187–  
681 198
- 682 Hajnal A, Whitfield CW & Kim SK (1997) Inhibition of *Caenorhabditis elegans* vulval induction by  
683 gap-1 and by let-23 receptor tyrosine kinase. **11**: 2715–2728
- 684 Hoskins R, Hajnal AF, Harp SA & Kim SK (1996) The *C. elegans* vulval induction gene *lin-2* encodes a  
685 member of the MAGUK family of cell junction proteins. **122**: 97–111

Haag et al.

- 686 Hsu PD, Scott DA, Weinstein JA, Ran FA, Konermann S, Agarwala V, Li Y, Fine EJ, Wu X, Shalem O,  
687 Cradick TJ, Marraffini LA, Bao G & Zhang F (2013) DNA targeting specificity of RNA-guided Cas9  
688 nucleases. *Nat Biotechnol* **31**: 827–832
- 689 Hwang BJ & Sternberg PW (2004) A cell-specific enhancer that specifies lin-3 expression in the C.  
690 elegans anchor cell for vulval development. *Development* **131**: 143–151
- 691 Inoue T, Oz HS, Wiland D, Gharib S, Deshpande R, Hill RJ, Katz WS & Sternberg PW (2004) C. elegans  
692 LIN-18 is a Ryk ortholog and functions in parallel to LIN-17/Frizzled in Wnt signaling. *Cell* **118**: 795–  
693 806
- 694 Inoue T, Sherwood DR, Aspöck G, Butler JA, Gupta BP, Kirouac M, Wang M, Lee P-Y, Kramer JM, Hope  
695 I, Bürglin TR & Sternberg PW (2002) Gene expression markers for Caenorhabditis elegans vulval  
696 cells. *Mech. Dev.* **119 Suppl 1**: S203–9
- 697 Jaronen M, Vehviläinen P, Malm T, Keksa-Goldsteine V, Pollari E, Valonen P, Koistinaho J & Goldsteins  
698 G (2013) Protein disulfide isomerase in ALS mouse glia links protein misfolding with NADPH  
699 oxidase-catalyzed superoxide production. *Hum Mol Genet* **22**: 646–655
- 700 Kaech SM, Whitfield CW & Kim SK (1998) The LIN-2/LIN-7/LIN-10 complex mediates basolateral  
701 membrane localization of the C. elegans EGF receptor LET-23 in vulval epithelial cells. *Cell* **94**: 761–  
702 771
- 703 Kamath RS & Ahringer J (2003) Genome-wide RNAi screening in Caenorhabditis elegans. *Methods*  
704 **30**: 313–321
- 705 Li J, Soroka J & Buchner J (2012) The Hsp90 chaperone machinery: conformational dynamics and  
706 regulation by co-chaperones. *Biochim Biophys Acta* **1823**: 624–635
- 707 Manders EMM, Verbeek FJ & Aten JA (2011) Measurement of co-localization of objects in dual-colour  
708 confocal images. *Journal of microscopy* **169**: 375–382
- 709 Maxeiner S, Grolleman J, Schmid T, Kammenga J & Hajnal A (2019) The hypoxia-response pathway  
710 modulates RAS/MAPK-mediated cell fate decisions in Caenorhabditis elegans. *Life Sci Alliance* **2**:  
711 e201800255
- 712 Mello CC, Kramer JM, Stinchcomb D & Ambros V (1991) Efficient gene transfer in C.elegans:  
713 extrachromosomal maintenance and integration of transforming sequences. *EMBO J* **10**: 3959–3970
- 714 Ninagawa S, Okada T, Sumitomo Y, Horimoto S, Sugimoto T, Ishikawa T, Takeda S, Yamamoto T,  
715 Suzuki T, Kamiya Y, Kato K & Mori K (2015) Forcible destruction of severely misfolded mammalian  
716 glycoproteins by the non-glycoprotein ERAD pathway. *J Cell Biol* **211**: 775–784



Haag et al.

- 717 Randow F & Seed B (2001) Endoplasmic reticulum chaperone gp96 is required for innate immunity  
718 but not cell viability. *Nat Cell Biol* **3**: 891–896
- 719 Ripoche J, Link B, Yucel JK, Tokuyasu K & Malhotra V (1994) Location of Golgi membranes with  
720 reference to dividing nuclei in syncytial *Drosophila* embryos. *Proceedings of the National Academy of*  
721 *Sciences* **91**: 1878–1882
- 722 Rolls MM, Hall DH, Victor M, Stelzer EHK & Rapoport TA (2002) Targeting of rough endoplasmic  
723 reticulum membrane proteins and ribosomes in invertebrate neurons. *Mol Biol Cell* **13**: 1778–1791
- 724 Schindelin J, Arganda-Carreras I, Frise E, Kaynig V, Longair M, Pietzsch T, Preibisch S, Rueden C,  
725 Saalfeld S, Schmid B, Tinevez J-Y, White DJ, Hartenstein V, Eliceiri K, Tomancak P & Cardona A (2012)  
726 Fiji: an open-source platform for biological-image analysis. *Nat Meth* **9**: 676–682
- 727 Schmid T, Snoek LB, Fröhli E, van der Bent ML, Kammenga J & Hajnal A (2015) Systemic Regulation  
728 of RAS/MAPK Signaling by the Serotonin Metabolite 5-HIAA. *PLoS Genet* **11**: e1005236
- 729 Shaye DD & Greenwald I (2002) Endocytosis-mediated downregulation of LIN-12/Notch upon Ras  
730 activation in *Caenorhabditis elegans*. *Nature* **420**: 686–690
- 731 Shen Z, Zhang X, Chai Y, Zhu Z, Yi P, Feng G, Li W & Ou G (2014) Conditional knockouts generated by  
732 engineered CRISPR-Cas9 endonuclease reveal the roles of coronin in *C. elegans* neural development.  
733 *Dev. Cell* **30**: 625–636
- 734 Skorobogata O & Rocheleau CE (2012) RAB-7 antagonizes LET-23 EGFR signaling during vulva  
735 development in *Caenorhabditis elegans*. *PLoS ONE* **7**: e36489
- 736 Skorobogata O, Escobar-Restrepo JM & Rocheleau CE (2014) An AGEF-1/Arf GTPase/AP-1 Ensemble  
737 Antagonizes LET-23 EGFR Basolateral Localization and Signaling during *C. elegans* Vulva Induction.  
738 *PLoS Genet* **10**: e1004728
- 739 Sorkin A & Goh LK (2009) Endocytosis and intracellular trafficking of ErbBs. *Exp Cell Res* **315**: 683–  
740 696
- 741 Sternberg PW (2005) Vulval development. *WormBook*: 1–28
- 742 Sternberg PW & Horvitz HR (1986) Pattern formation during vulval development in *C. elegans*. *Cell*  
743 **44**: 761–772
- 744 Stetak A, Hoier EF, Croce A, Cassata G, Di Fiore PP & Hajnal A (2006) Cell fate-specific regulation of  
745 EGF receptor trafficking during *Caenorhabditis elegans* vulval development. *EMBO J* **25**: 2347–2357
- 746 Sundaram MV (2006) RTK/Ras/MAPK signaling. *WormBook*: 1–19

Haag et al.

- 747 Taylor RC & Dillin A (2013) XBP-1 is a cell-nonautonomous regulator of stress resistance and  
748 longevity. *Cell* **153**: 1435–1447
- 749 Van de Vijver MJ, Kumar R & Mendelsohn J (1991) Ligand-induced activation of A431 cell epidermal  
750 growth factor receptors occurs primarily by an autocrine pathway that acts upon receptors on the  
751 surface rather than intracellularly. *J Biol Chem* **266**: 7503–7508
- 752 Verba KA & Agard DA (2017) How Hsp90 and Cdc37 Lubricate Kinase Molecular Switches. *Trends*  
753 *Biochem. Sci.* **42**: 799–811
- 754 Voeltz GK, Rolls MM & Rapoport TA (2002) Structural organization of the endoplasmic reticulum.  
755 *EMBO Rep.* **3**: 944–950
- 756 Walser M, Umbricht CA, Fröhli E, Nanni P & Hajnal A (2017)  $\beta$ -Integrin de-phosphorylation by the  
757 Density-Enhanced Phosphatase DEP-1 attenuates EGFR signaling in *C. elegans*. *PLoS Genet* **13**:  
758 e1006592
- 759 Whitfield CW, Bénard C, Barnes T, Hekimi S & Kim SK (1999) Basolateral localization of the  
760 *Caenorhabditis elegans* epidermal growth factor receptor in epithelial cells by the PDZ protein LIN-  
761 10. *Mol Biol Cell* **10**: 2087–2100
- 762

Haag et al.

763 **Figures**

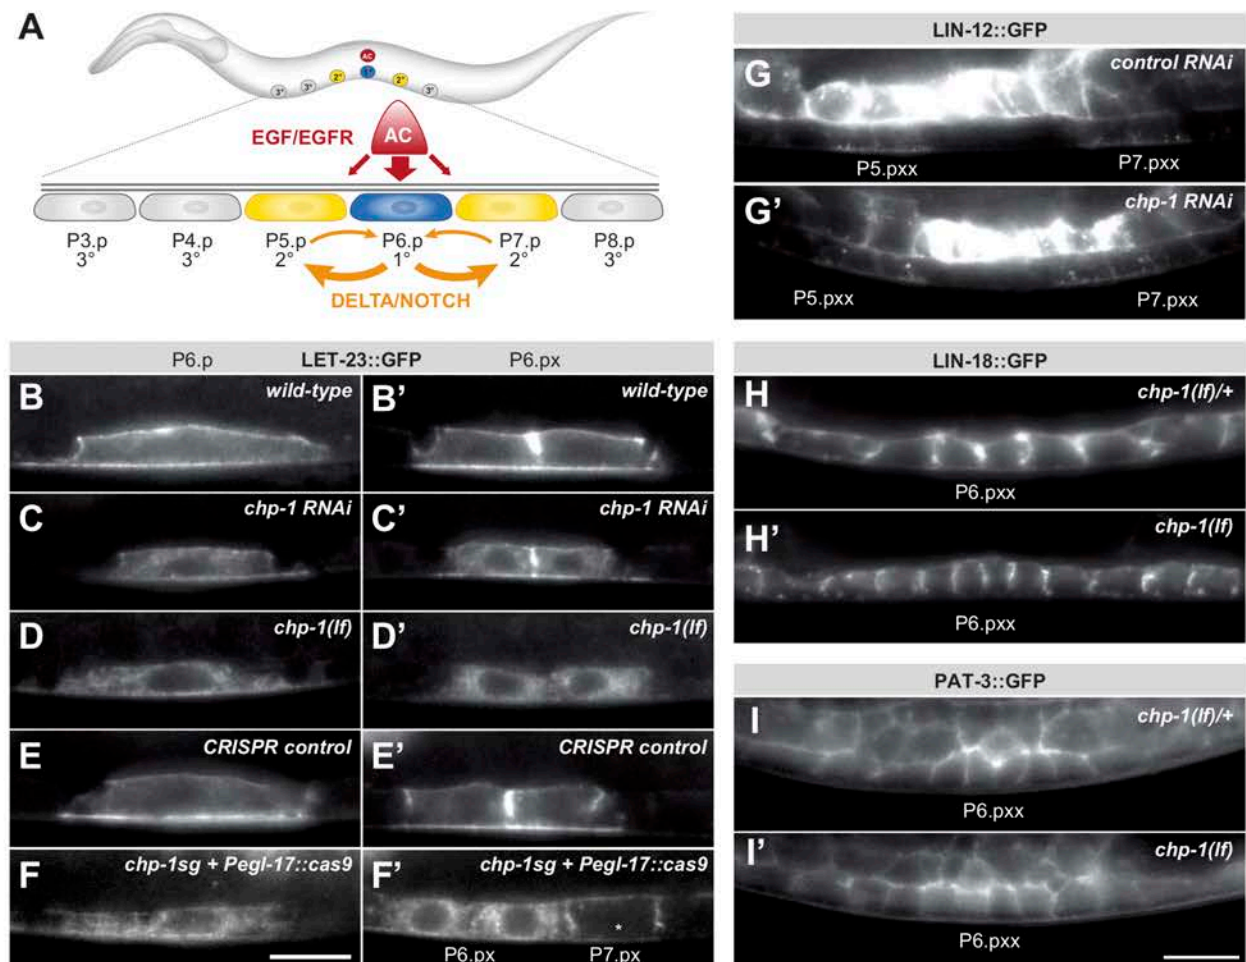

764  
 765 **Figure 1. *chp-1* is required for the plasma membrane localization of LET-23::GFP.**  
 766 (A) Overview of the EGFR and NOTCH signaling pathways controlling VPC fate determination. (B)  
 767 LET-23::GFP localization in P6.p and (B') the two P6.p daughters (P6.px stage) of a wild-type, (C, C')  
 768 a *chp-1* RNAi and (D, D') a homozygous *chp-1(tm2277lf)* mutant larva. (E-F') Tissue-specific  
 769 CRISPR/CAS9 induced deletion of *chp-1* in the 1° vulval cells. (E,E') LET-23::GFP expression in a  
 770 negative control sibling lacking the transgene and (F,F') an animal carrying the *zhEx558[chp-1sg, egl-*  
 771 *17p::cas-9]* transgene. Note in (F') the intracellular mislocalization of LET-23::GFP in the two P6.p  
 772 descendants, while LET-23::GFP remained localized at the plasma membrane of the P7.p descendants  
 773 (asterisk). (G) LIN-12::GFP localization in a control RNAi and (G') a *chp-1* RNAi treated animals at the  
 774 Pn.pxx stage. Note the unchanged apical localization of LIN-12::GFP in the 2° P5.p and P7.p  
 775 descendants (underlined). (H) LIN-18::GFP membrane localization in a heterozygous *chp-*  
 776 *1(tm2277lf)/+* and (H') a homozygous *chp-1(tm2277lf)* mutant at the Pn.pxx stage. (I) PAT-3::GFP

Haag et al.

777 membrane localization in a heterozygous *chp-1(tm2277lf)/+* and (**I'**) a homozygous *chp-1(tm2277lf)*  
778 mutant at the Pn.pxx stage. The 1° P6.p descendants are underlined. At least 20 animals were  
779 analyzed for each condition. The scale bars in (**F'**) and (**I'**) are 10  $\mu$ m.

Haag et al.

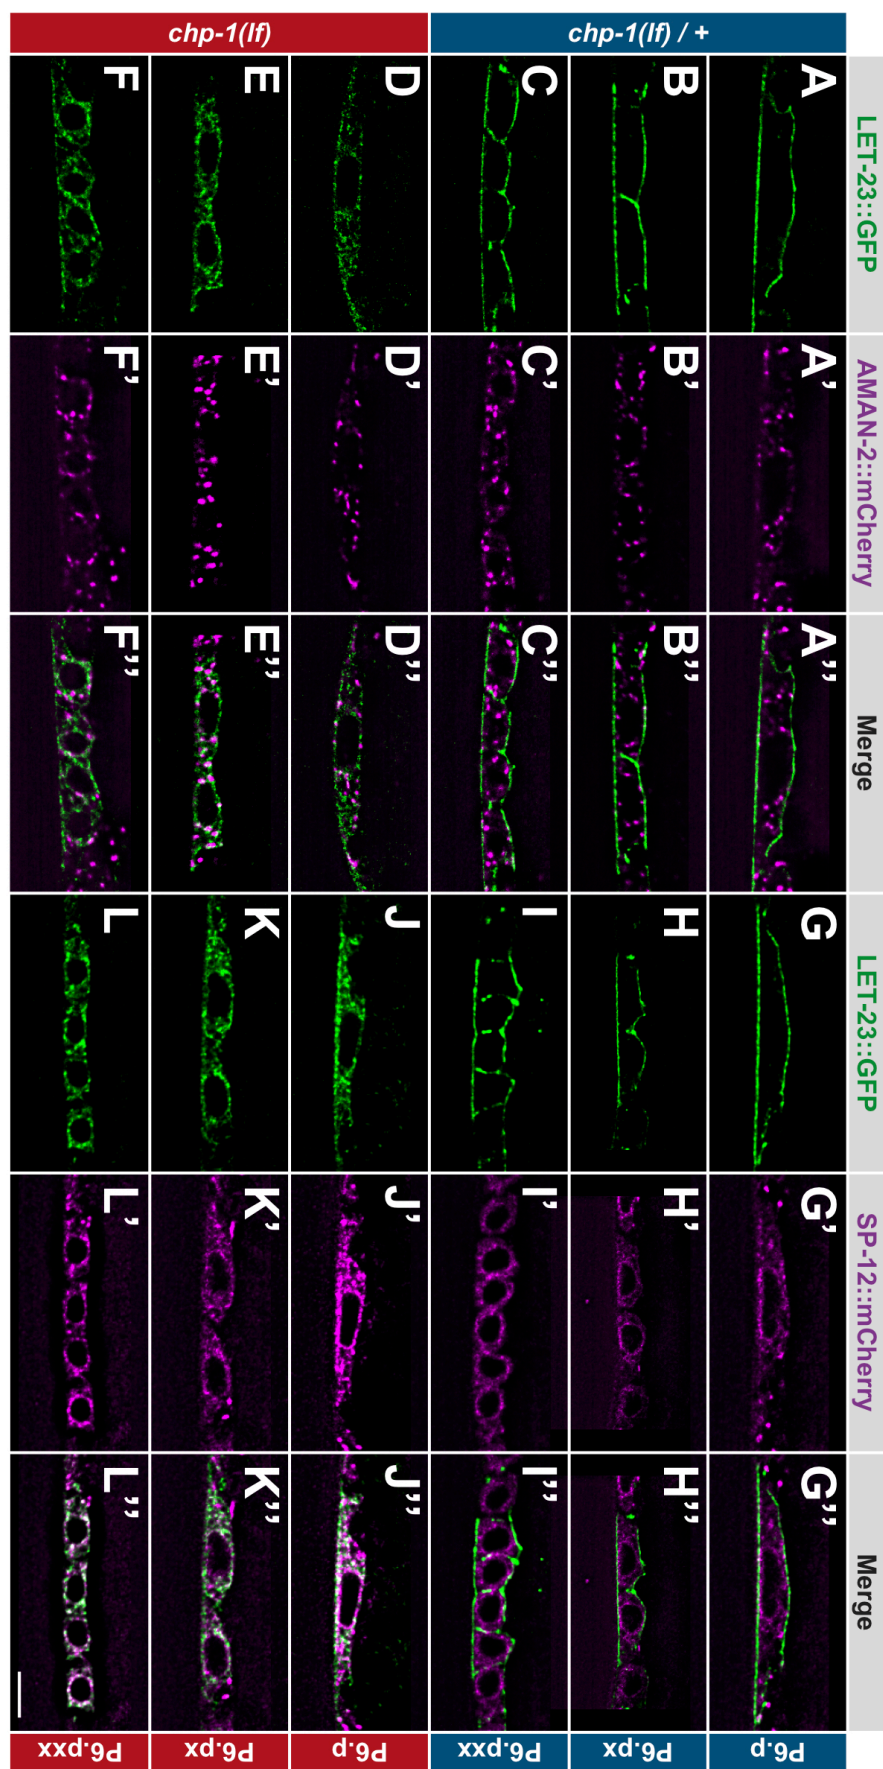

Haag et al.

781 **Figure 2. ER mislocalization of LET-23::GFP in *chp-1(lf)* mutants.**

782 **(A-C'')** Localization of LET-23::GFP and the AMAN-2::mCherry Golgi marker in heterozygous *chp-*  
783 *1(tm2277lf)/+* control siblings and **(D-F'')** homozygous *chp-1(tm 2277lf)* mutants at the P6.p to  
784 P6.pxx stage. **(G-I'')** Localization of LET-23::GFP and the SP12::mCherry ER marker in heterozygous  
785 *chp-1(tm2277lf)/+* control siblings and **(J-L'')** homozygous *chp-1(tm 2277lf)* mutants at the P6.p to  
786 P6.pxx stage. The individual panels show the different channels of single mid-sagittal confocal  
787 sections through P6.p or its descendants. A voxel by voxel quantification of the co-localization  
788 between the AMAN-2::mCherry (Golgi) and SP12::mCherry (ER) markers with the LET-23::GFP  
789 signal is shown in **suppl. Fig. S2**. The scale bar in **(L'')** is 10  $\mu$ m.

790

Haag et al.

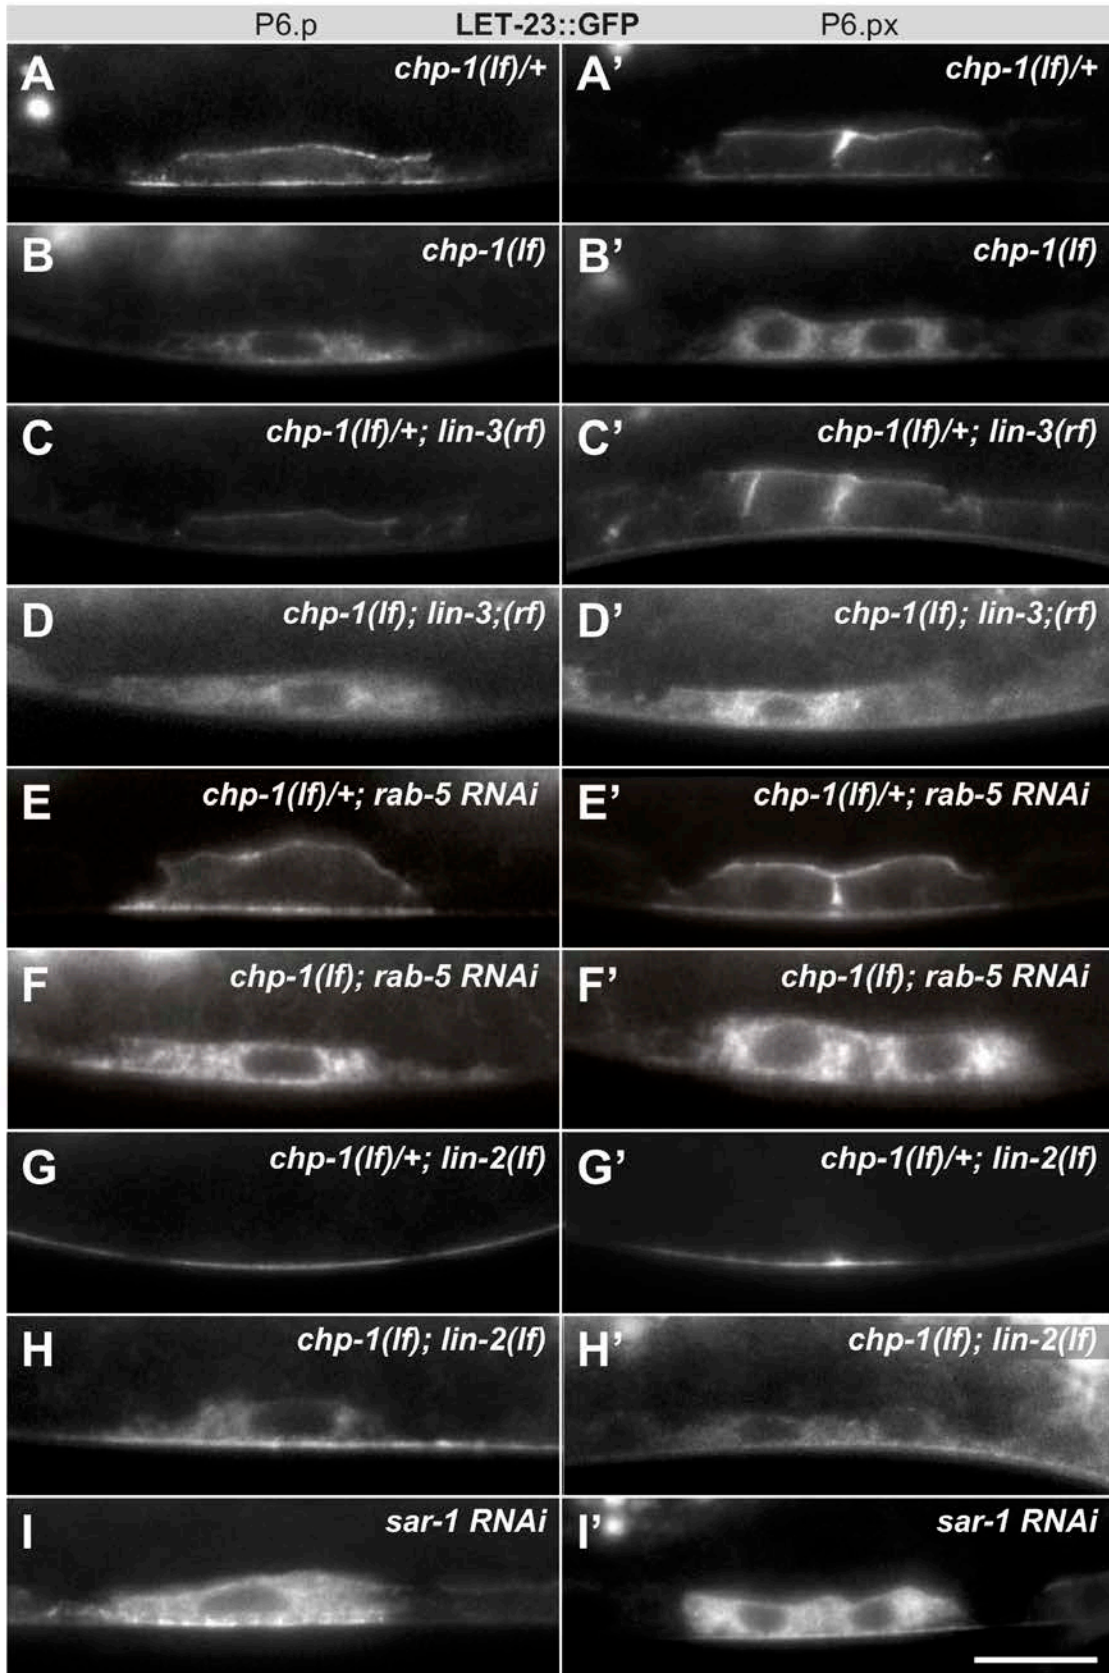

791

Haag et al.

792 **Figure 3. Intracellular mislocalization of LET-23::GFP in *chp-1(lf)* mutants is ligand**  
793 **independent.**

794 (A, A') Localization of LET-23::GFP in heterozygous *chp-1(tm2277lf)/+* control siblings, (B, B')  
795 homozygous *chp-1(tm 2277lf)* mutants, (C, C') *lin-3(e1417rf)* single mutants, and (D, D') in *chp-*  
796 *1(tm2277lf); lin-3(e1417rf)* double mutants at the P6.p and P6.px stage. (E,E') LET-23::GFP  
797 localization in *rab-5* RNAi treated heterozygous *chp-1(tm2277lf)/+* controls and (F, F') homozygous  
798 *chp-1(tm 2277lf)* mutants. (G, G') Apical mislocalization of LET-23::GFP in *lin-2(n397lf)* single  
799 mutants and (H, H') intracellular LET-23::GFP localization in *chp-1(tm2277lf); lin-2(n397lf)* double  
800 mutants. (I,I') *sar-1* RNAi causes the same intracellular accumulation of LET-23::GFP as *chp-1(lf)*. At  
801 least 20 animals were analyzed for each condition. The scale bar in (I') is 10  $\mu$ m.

802



Haag et al.

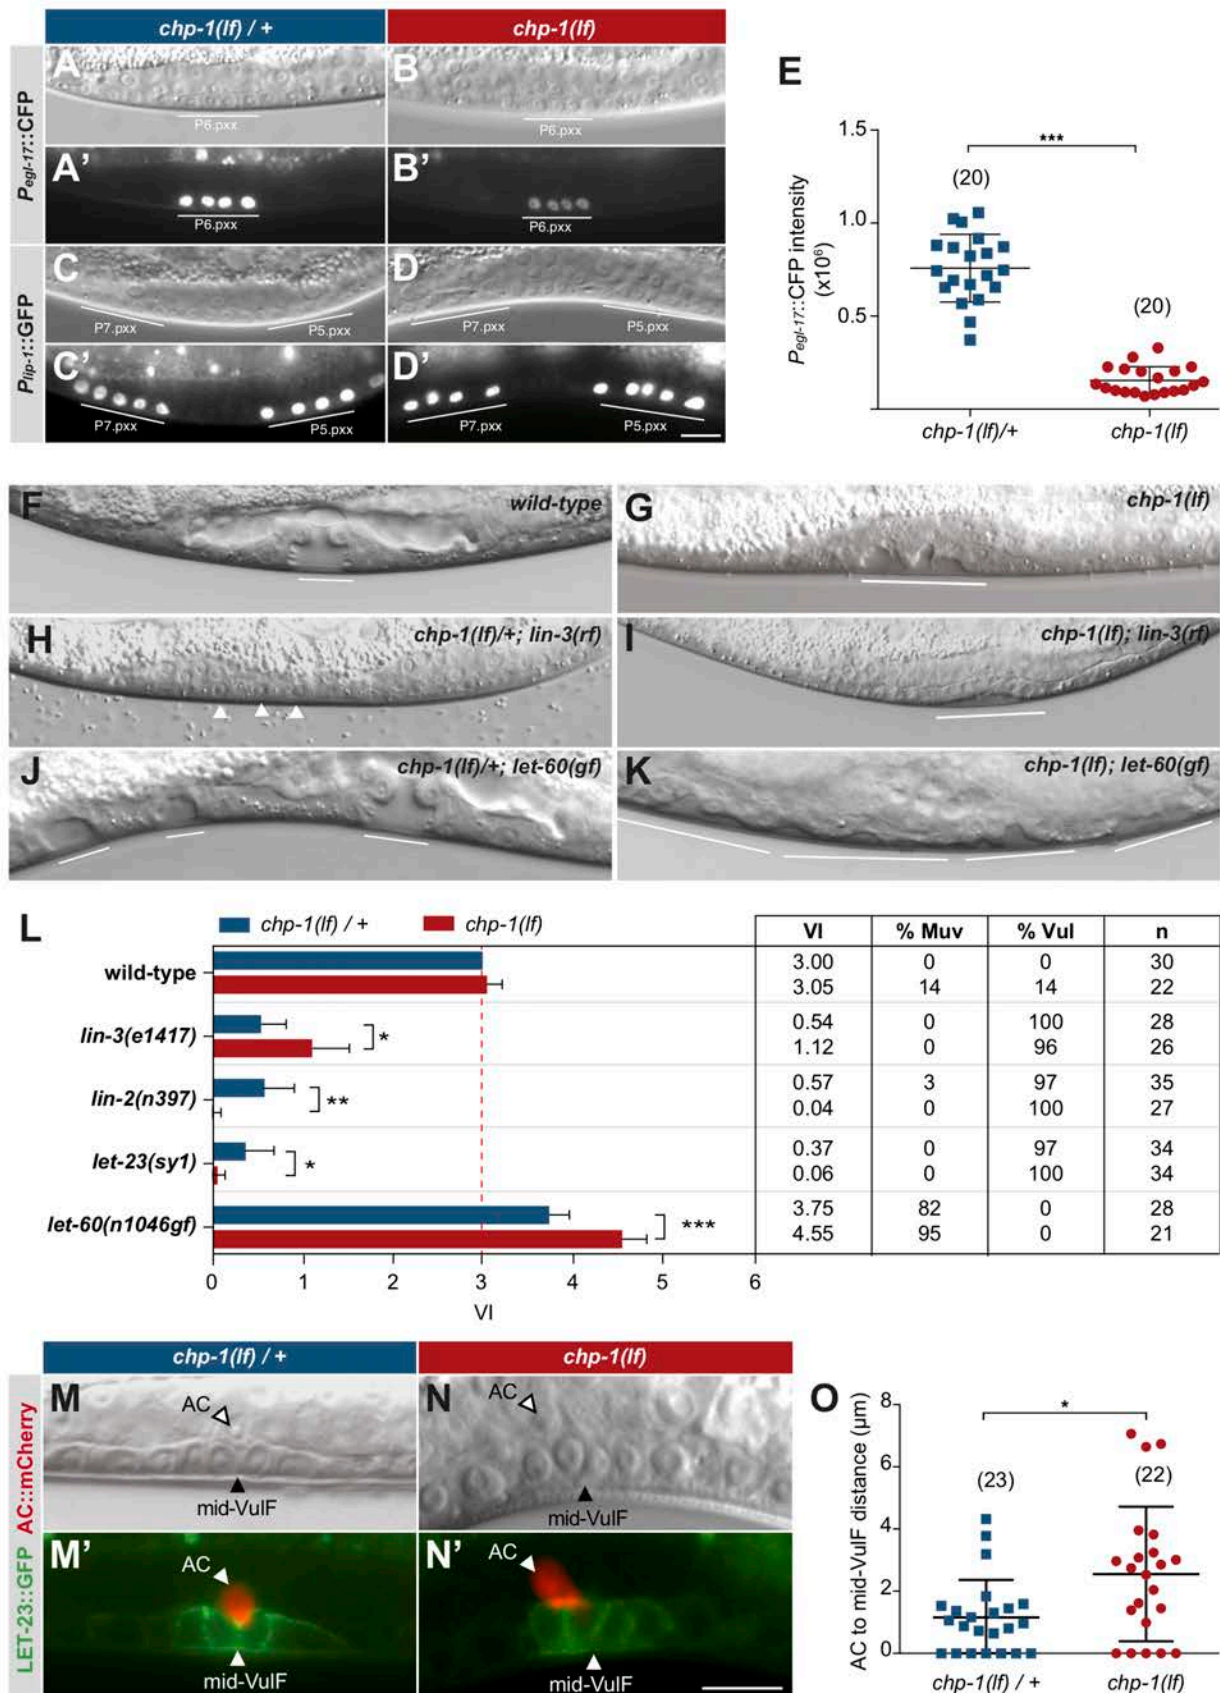

803

Haag et al.

804 **Figure 4. CHP-1 positively regulates EGFR/RAS/MAPK signaling in the VPCs.**

805 **(A, A')** Expression of the 1° cell fate reporter *Pegl-17::CFP* in heterozygous *chp-1(tm2277lf)/+* and  
806 **(B, B')** homozygous *chp-1(lf)* mutant at the Pn.pxx stage. The top panels show Nomarski images of  
807 the differentiating VPCs and the bottom panel the reporter expression taken with identical exposure  
808 settings. **(C, C')** Expression of the 2° cell fate reporter *Plip-1::GFP* in heterozygous *chp-1(tm2277lf)/+*  
809 and **(D, D')** homozygous *chp-1(lf)* mutant at the Pn.pxx stage. The scale bar in **(D')** is 10 μm. **(E)**  
810 Quantification of the *Pegl-17::CFP* fluorescence intensity in the 1° VPCs at the Pn.pxx stage. The p-  
811 value was calculated by a two-tailed t-test for independent samples. The numbers of animals  
812 quantified are indicated in brackets. **(F)** Nomarski images of the vulval morphology in wild-type, **(G)**  
813 homozygous *chp-1(tm2277lf)*, **(H)** heterozygous *chp-1(tm2277lf)/+; lin-3(e1417rf)*, **(I)** homozygous  
814 *chp-1(tm2277lf); lin-3(e1417rf)*, **(J)** heterozygous *chp-1(tm2277lf)/+; let-60(n1046gf)* and **(K)**  
815 homozygous *chp-1(tm2277lf); let-60(n1046gf)* L4 larvae. The descendants of induced VPCs forming  
816 an invagination are underlined and the arrowheads in **(H)** point at the nuclei of uninduced VPCs. **(L)**  
817 Quantification of the vulval induction index (VI) for the indicated genotypes. The table to the right  
818 shows the absolute mean VI, the percentage of animals with a Muv (VI>3) and a Vul (VI<3) phenotype  
819 and the number of animals scored (n) for each genotype. Error bars indicating the 95% confidence  
820 intervals and p-values were calculated by Bootstrapping with a resampling size of 1000, as described  
821 in Maxeiner *et al.* (2019) (p < 0.05 = \* p < 0.01 = \*\* and p < 0.001 = \*\*\*). **(M, M')** AC to 1° VPC alignment  
822 at the Pn.pxx stage in heterozygous *chp-1(tm2277lf)/+* and **(N, N')** homozygous *chp-1(tm2277lf)*  
823 mutants. The top panels show Nomarski images and the bottom panels the expression of the LET-  
824 23::GFP reporter in green and the *qyls23[Pcdh-3::PLCδPH::mCherry]* reporter labelling the AC in red.  
825 The scale bar in **(N')** is 10 μm. **(O)** Quantification of the AC to VulF midline distance. The p-value was  
826 calculated by a two-tailed t-test for independent samples, and the numbers of animals scored are  
827 indicated in brackets.

828

Haag et al.

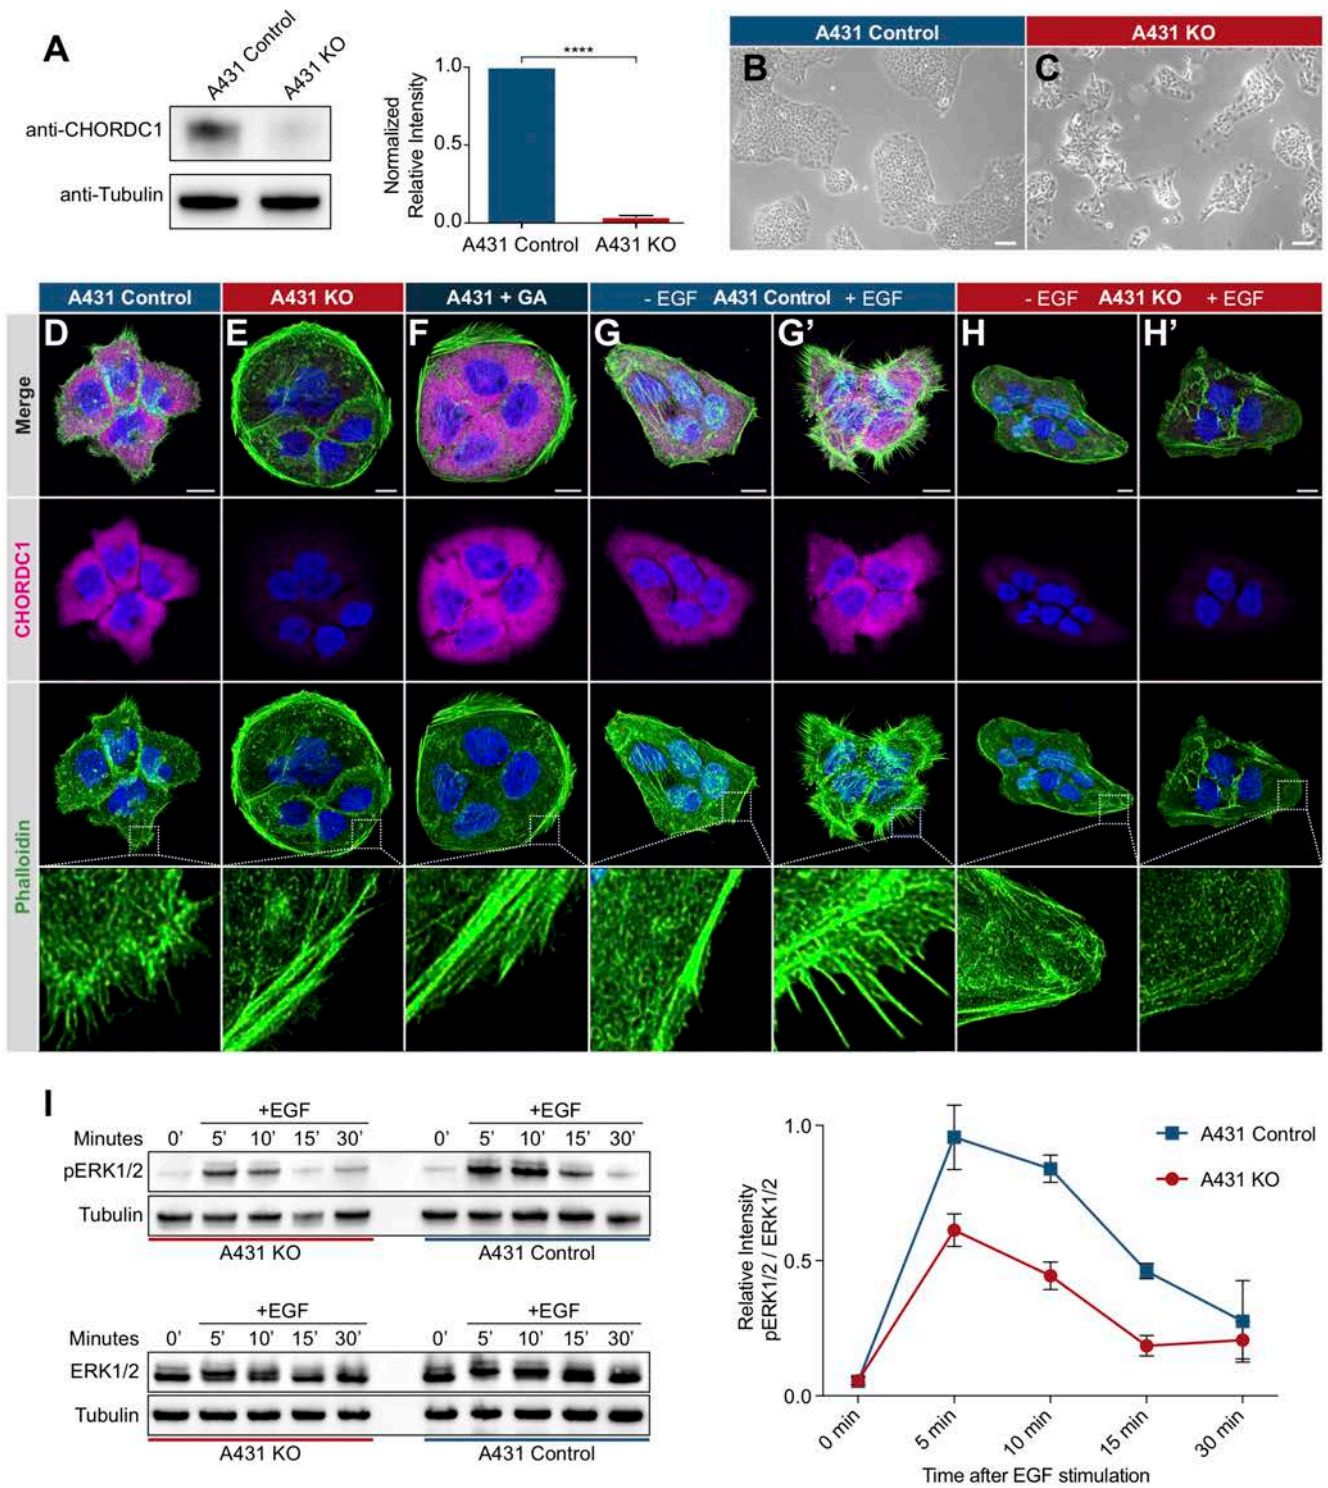

82

830

Haag et al.

831 **Figure 5. CHORDC1 is required for EGF-induced filopodia formation and sustained ERK**  
832 **activation in A431 cells**

833 **(A)** Quantification of CHORDC1 protein levels in A431 control and KO cells by Western blot analysis  
834 (average of eleven biological replicates). The bar graph shows the normalized averaged relative  
835 intensities  $\pm$  SEM. The p-value was calculated using a two-tailed t-test for independent samples. **(B)**  
836 Phase contrast images of A431 control and **(C)** A431 KO cells 12 days post lentiviral transduction.  
837 The scale bars are 100  $\mu$ m. **(D)** Immunofluorescence staining of A431 control cells with antibodies  
838 recognizing CHORDC1 (magenta), fluorescently-labeled phalloidin (green) and DAPI (blue), **(E)** A431  
839 KO cells, and **(F)** A431 cells treated for 24 hours with 1  $\mu$ M geldanamycin (GA). **(G, H)** Control- and  
840 KO cells fixed after 16 hours of serum starvation, and **(G', H')** 10 minutes after stimulation with 100  
841 ng/ml human EGF. The scale bars are 10  $\mu$ m. The bottom row shows higher magnifications of the  
842 cortical regions outlined by the dashed squares. **(I)** Total protein lysates of serum starved cells that  
843 had been stimulated with 100 ng/ml human EGF for the indicated times (in minutes) were analyzed  
844 on Western blots with antibodies against phospho-ERK1/2 and total ERK1/2. The graph to the right  
845 shows the relative phospho-ERK1/2 signals normalized to the total ERK1/2 levels at each time point.  
846 The data shown represent the average ratios obtained in three biological replicates. Error bars  
847 indicate the SEM.

848

Haag et al.

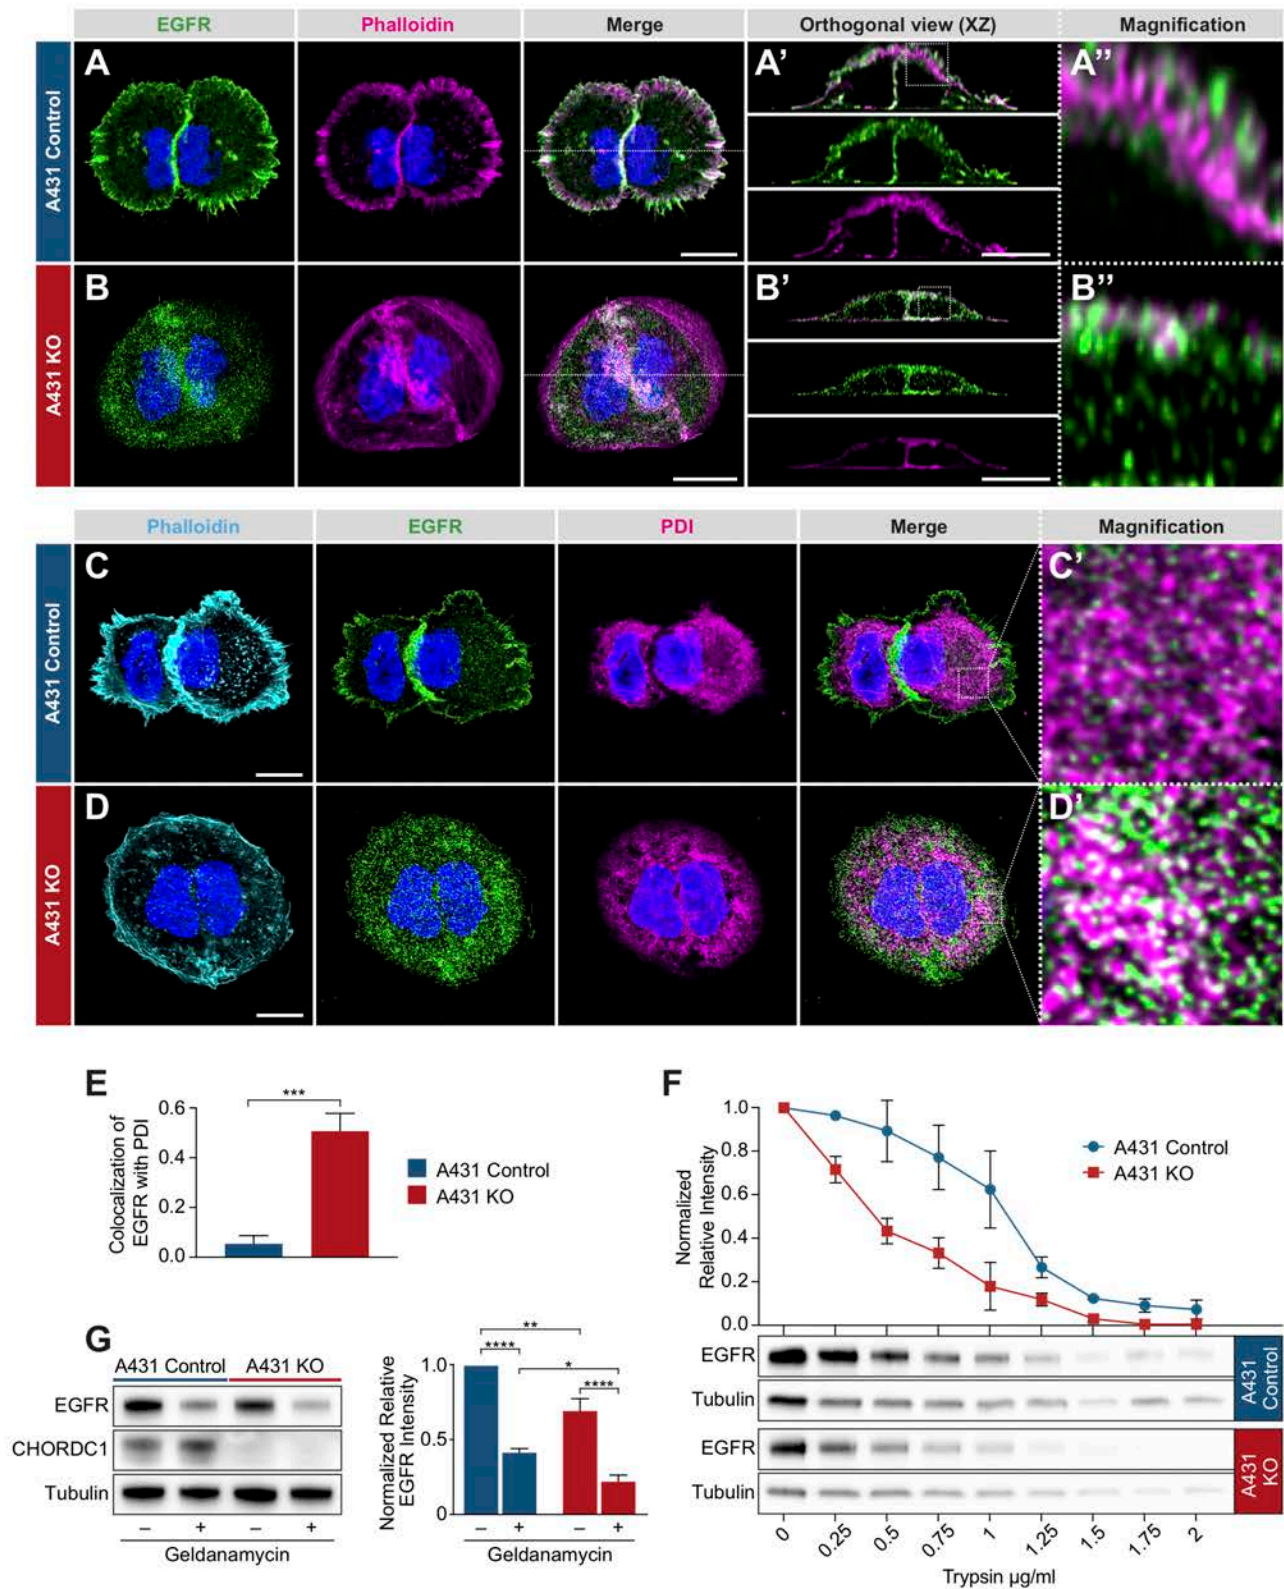

849

850

Haag et al.

851 **Figure 6. Mislocalization of the EGFR in CHORDC1 mutant A431 cells**

852 (A) Immunofluorescence staining of A431 control and (B) A431 KO cells with antibodies recognizing  
853 EGFR (green), fluorescently-labeled phalloidin (magenta) and DAPI (blue). The dotted lines in the  
854 merge panels indicate the planes used to create the orthogonal (XZ) views shown in (A', B'). The  
855 dotted squares in (A', B') indicate the areas shown at higher magnification in (A'', B''). (C)  
856 Immunofluorescence staining of A431 control- and (D) KO cells with fluorescently-labeled phalloidin  
857 (light blue), antibodies recognizing EGFR (green), the endoplasmic reticulum marker PDI (magenta),  
858 and with DAPI (blue). (C', D') show higher magnifications of the regions outlined with dotted squares  
859 in the merge panels of (C, D). All images are maximum intensity projection of three confocal sections.  
860 The scale bars are 10  $\mu\text{m}$ . (E) Co-localization of EGFR and PDI in A431 control (n=5) and A431 KO  
861 cells (n=10) was quantified by calculating the Mander's coefficient as described in materials and  
862 methods (Manders *et al*, 2011). p-values were calculated by a two-tailed t-test for independent  
863 samples. Error bars show the SEM. (F) Trypsin sensitivity assay. Total protein extracts of A431  
864 control and A431 KO cells were incubated with the indicated trypsin concentrations, and the samples  
865 were analyzed by Western blotting with antibodies against EGFR and tubulin. The line graph shows  
866 a quantification of the EGFR levels double normalized to the tubulin signal in each sample and to the  
867 undigested (0  $\mu\text{g}/\text{ml}$ ) samples. Error bars show the SEM. The average of three biological replicates is  
868 shown. (G) Western blot analysis of EGFR and CHORDC1 protein levels in A431 control and A431 KO  
869 cells with and without 1  $\mu\text{M}$  geldanamycin treatment. The bar graph shows the normalized averaged  
870 relative intensities  $\pm$  SEM. p-values ( $p < 0.05 = *$ ,  $p < 0.01 = **$  and  $p < 0.0001 = ***$ ) were calculated  
871 by one-way ANOVA and corrected with a Tukey multiple comparison test. The average of three  
872 biological replicates is shown.

873

Haag et al.

874 **Supplementary information**

875 **Supplementary figures**

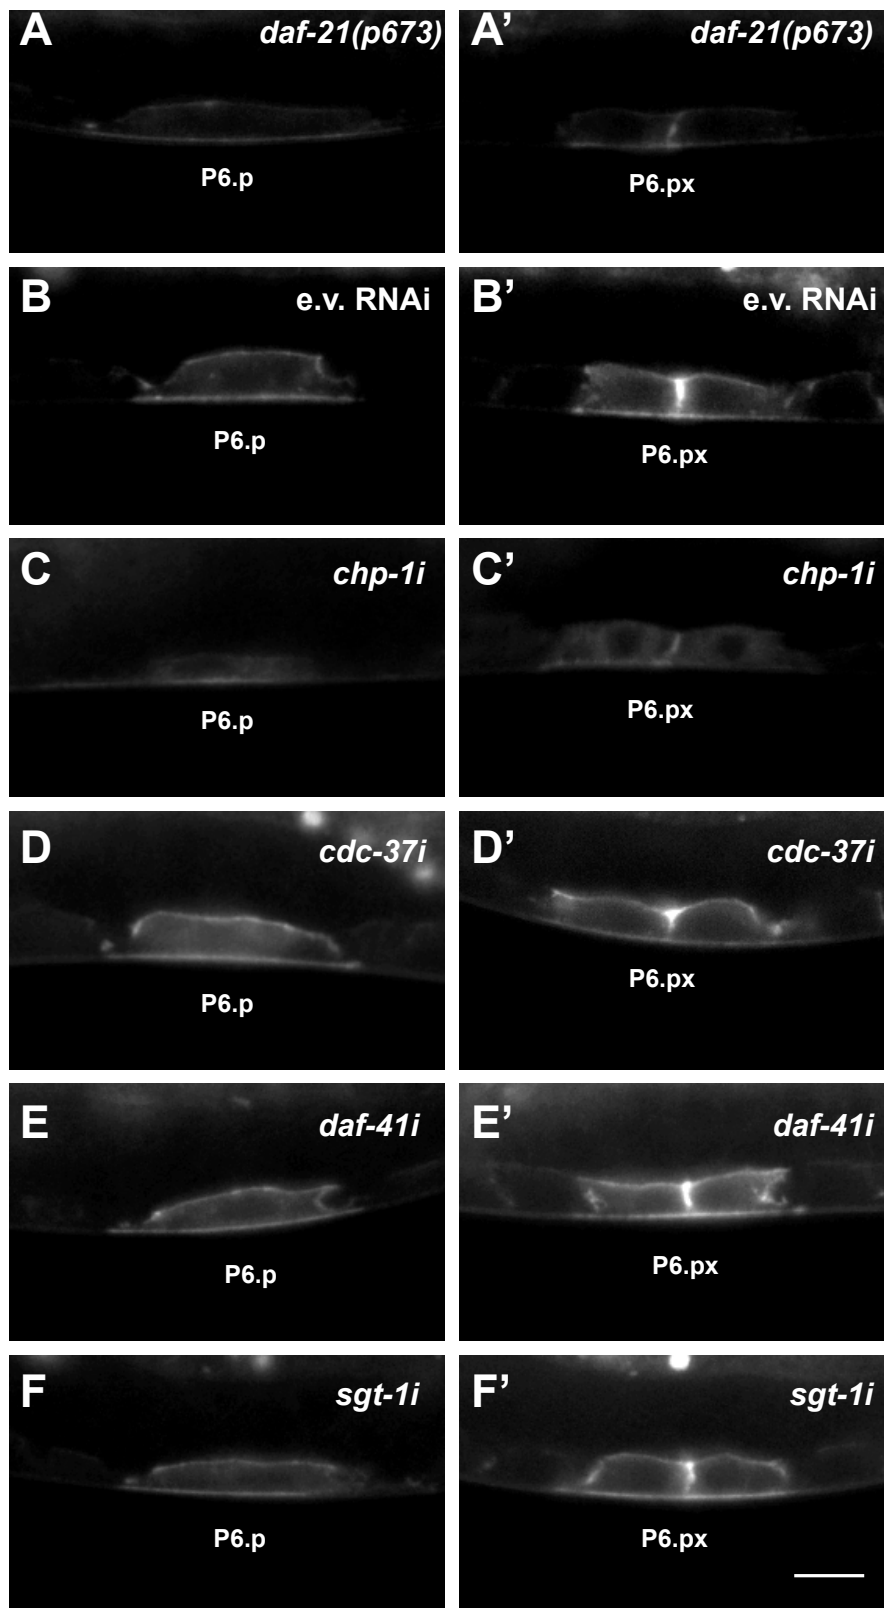

876

Haag et al.

877 **suppl. Fig. S1. LET-23::GFP localization in *daf-21(p673)* mutants and after RNAi knock-down**  
878 **of co-chaperones.** LET-23::GFP localization in P6.p and (left panels) the two P6.p daughters (right  
879 panels) in **(A,A')** *daf-21(p673)* mutants and **(B-F')** under the indicated RNAi conditions. E.v. RNAi in  
880 **(B,B')** are the negative controls treated with empty RNAi vector. At least 20 animals were analyzed  
881 for each condition.  
882



Haag et al.

883

Figure S2

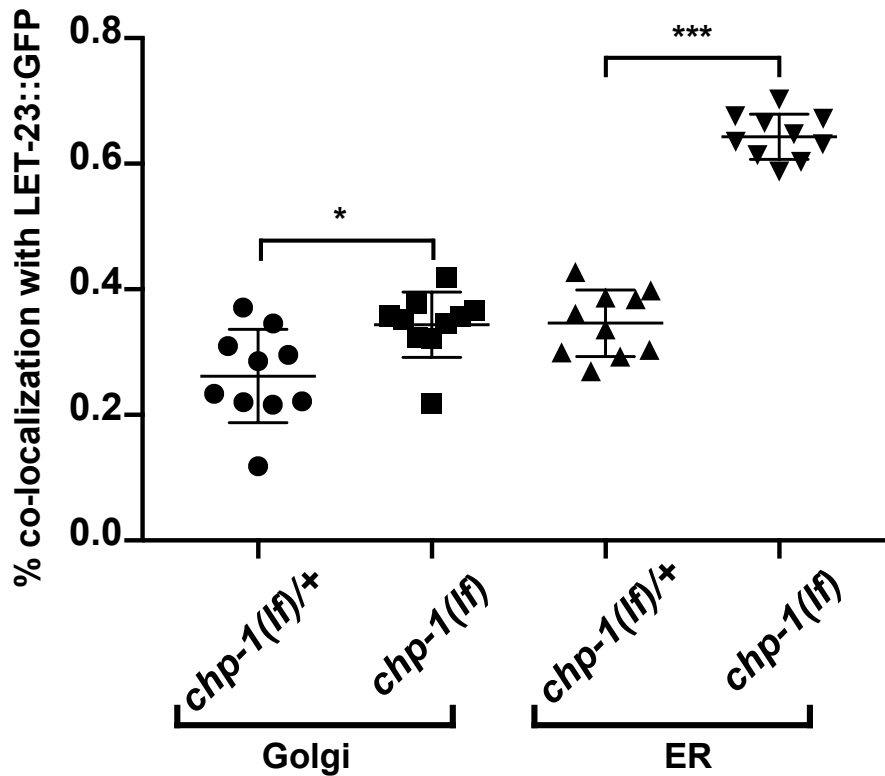

884

885 **suppl. Fig. S2. Quantification of the co-localization between the AMAN-2::mCherry (Golgi) and**  
886 **SP12::mCherry (ER) markers with LET-23::GFP in P6.p and its descendants.** Co-localization of  
887 the AMAN-2::mCherry Golgi or the SP12::mCherry ER marker with LET-23::GFP was quantified by  
888 calculating the thresholded Mander's coefficient (MANDERS *et al*, 2011) as described in materials  
889 and methods. Error bars show the standard error of the mean (SEM). p-values were calculated by  
890 two-tailed t-tests for independent samples ( $p < 0.05 = *$  and  $p < 0.001 = ***$ ). Ten animals were  
891 analyzed for each condition.

892

Haag et al.

Figure S3

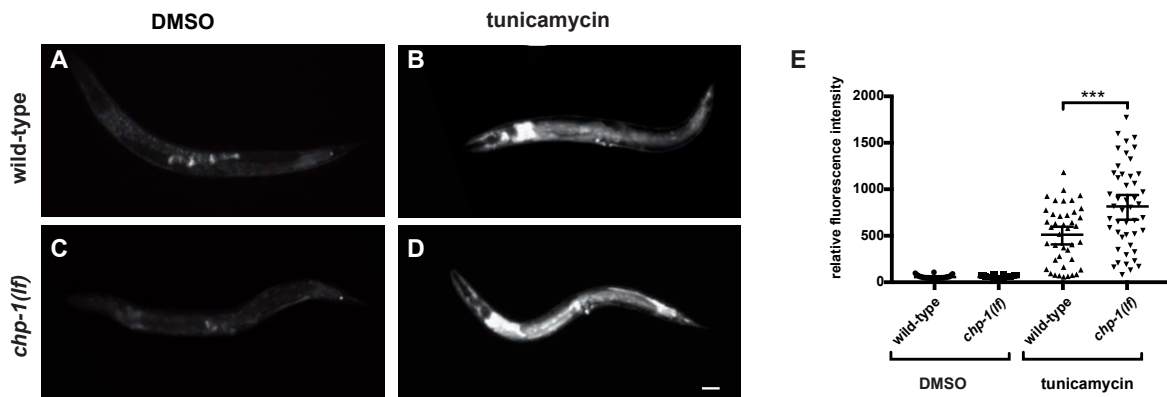

893  
894 **suppl. Fig. S3. Unfolded protein response in *chp-1(tm2277lf)* mutants after tunicamycin**  
895 **treatment.** (A) HSP-4::GFP expression in untreated (DMSO) controls and (B) tunicamycin treated  
896 wild-type animals, and (C) in untreated and (D) tunicamycin treated *chp-1(lf)* mutants. The scale bar  
897 is 10 $\mu$ m. (E) Quantification of HSP-4::GFP signal intensities under the different conditions. Error bars  
898 indicate the 95% CI. p-values were calculated by t-tests for independent samples and are indicated  
899 as \*\*\* for  $p < 0.01$ . Between 26 and 47 animals were analyzed for the different conditions.  
900

Haag et al.

| Strain | Genotype                                                                                                                                     | Reference                  |
|--------|----------------------------------------------------------------------------------------------------------------------------------------------|----------------------------|
| AH1779 | <i>zhis38[let-23::gfp;unc-119(+)]</i>                                                                                                        | Haag et al., 2014          |
| SJ4005 | <i>zcls4[isp-4::gfp]</i>                                                                                                                     | Calfon et al., 2002        |
| AH3131 | <i>chp-1(tm2277)/hT2</i>                                                                                                                     | Mitani knockout consortium |
| AH3067 | <i>chp-1(tm2277)/hT2 i; zhis38[let-23::gfp;unc-119(+)]</i>                                                                                   | this study                 |
| AH3080 | <i>chp-1(tm2277)/hT2; let-60(n1046)</i>                                                                                                      | this study                 |
| AH3081 | <i>chp-1(tm2277)/hT2; qyls43 [pat-3::gfp; ina-1, unc-119(+)]</i>                                                                             | this study                 |
| AH3098 | <i>chp-1(tm2277)/hT2; lin-2(n397)</i>                                                                                                        | this study                 |
| AH3388 | <i>chp-1(tm2277)/hT2; let-23(sy1)</i>                                                                                                        | this study                 |
| AH3412 | <i>chp-1(tm2277)/hT2; zhis4[ip-1::ms::gfp::locZ]</i>                                                                                         | this study                 |
| AH4418 | <i>chp-1(tm2277)/hT2; lin-3(e1417) zhis38[let-23::gfp;unc-119(+)]</i>                                                                        | this study                 |
| AH4483 | <i>chp-1(tm2277)/hT2; syls75[lin-18::gfp + unc-119(+)]</i>                                                                                   | this study                 |
| AH4487 | <i>chp-1(tm2277)/hT2; zhis38[let-23::gfp;unc-119(+)]; lin-2(n397)</i>                                                                        | this study                 |
| AH4510 | <i>chp-1(tm2277)/hT2; unc-119(ed4) III; qyls176[zmp-1::mCherry::moelABD + unc-119(+)]; zhis38[let-23::gfp;unc-119+]</i>                      | this study                 |
| AH4609 | <i>zhis38[let-23::gfp;unc-119+]; zhex558[Pegl-17::cos-9; SG#1 chp-1; SG#2 chp-1]</i>                                                         | this study                 |
| AH4647 | <i>zhis38[let-23::gfp;unc-119+]; ddf-21(p673)</i>                                                                                            | this study                 |
| AH4689 | <i>chp-1(tm2277)/hT2 i; zhis104[Pdly-1::mon-2::mCherry::unc-54 3' UTR, unc-119(+)]; zhis38[let-23::gfp;unc-119+]</i>                         | this study                 |
| AH4709 | <i>chp-1(tm2277)/hT2 i; zhis105 [pdly-1::mCherry::C34B2.10(SP12)::unc-54 3' UTR, unc-119(+)]; unc-119(ed3); zhis38[let-23::gfp;unc-119+]</i> | this study                 |
| AH4756 | <i>chp-1(tm2277)/hT2; zcls4[isp-4::gfp]</i>                                                                                                  | this study                 |
| GS3201 | <i>aris82 [lin-12::gfp;unc-4(+); egl-17p::locZ]</i>                                                                                          | Shaye and Greenwald, 2002  |
| AH1312 | <i>chp-1(tm2277)/hT2; aris92[egl-17::cfp; tox-3::gfp]</i>                                                                                    | this study                 |

901

902 **suppl. Table S1.** Genotypes of the strains used in this study.

Haag et al.

| Primer Name | Sequence (5'-3')                                               |
|-------------|----------------------------------------------------------------|
| OAHE8       | TTA TTT CGT CTT CTT TGT CTC C                                  |
| OAHE19      | CAC CGA AGG AAG GAA GCA TGG TCT CAA AGG GTG AAG AAG ATA AC     |
| OAHE20      | CAT TCC GTC AGC GGC CGC CTT ATA CAA TTC ATC CAT GCC ACC        |
| OAHE21      | GCG GCC GCT GAC GGA ATG ATT GCA ATG CTC CC                     |
| OAHE22      | GGA GAC AAA GAA GAC GAA ATA AAG AAT TCC AAC TGA GCG CCG GTC GC |
| OEH152      | CAC CGA AGG AAG GAA GCA TGG GAA AAC GCA ATT TCT ATA TTA TC     |
| OEH153      | GCT TCC TTC CTT CGG TGA GGC G                                  |
| OEH154      | CGG GAT CCC CGG GAT TGG CC                                     |
| OEH156      | GAT GAA TTG TAT AAG TAG AGA ATT CCA ACT GAG CGC CGG TCG C      |
| OEH155      | CAA TCC CGG GGA TCC CGT TCT TCA TCA AAA TCT ACC G              |
| OEH157      | CTA CTT ATA CAA TTC ATC CAT GC                                 |
| OEH158      | GGG GCG AAA ACT CTC AAG GAT CT                                 |
| OEH159      | CTT GAG AGT TTT CGC CCC GAA GAA CGT TTT CCA ATG ATG AGC AC     |

903

904 **suppl. Table S2.** Oligonucleotide primers used for plasmid constructions.

905
